# Supplementary material for: Highly effective ammonia removal in a series of Brønsted acidic porous polymers: investigation of chemical and structural variations
Source: PubMed Central journal article supplement (PMC6100238; doi:10.1039/c6sc05079d), 2017-04-27
Supplement: SC-008-C6SC05079D-s001.pdf [file SC-008-C6SC05079D-s001.pdf]

# Highly Effective Ammonia Removal in a Series of Brønsted Acidic Porous Polymers: Investigation of Chemical and Structural Variations

Gokhan Barin,<sup>a</sup> Gregory W. Peterson,<sup>b</sup> Valentina Crocellà,<sup>c</sup> Jun Xu,<sup>d</sup> Kristen A. Colwell,<sup>d</sup>  
Aditya Nandy,<sup>d</sup> Jeffrey A. Reimer,<sup>de</sup> Silvia Bordiga,<sup>c</sup> Jeffrey R. Long<sup>\*ade</sup>

<sup>a</sup>Department of Chemistry and <sup>d</sup>Department of Chemical and Biomolecular Engineering, University of California, Berkeley, California 94720, USA

<sup>b</sup>Edgewood Chemical Biological Center, U.S. Army Research, Development, and Engineering Command, 5183 Blackhawk Road, Aberdeen Proving Ground, Maryland 21010, USA

<sup>c</sup>Department of Chemistry, NIS and INSTM Centre of Reference, University of Turin, Via Quarello 15, I-10135 Torino, Italy

<sup>e</sup>Materials Sciences Division, Lawrence Berkeley National Laboratory, Berkeley, California 94720, USA

\*Email: [jrlong@berkeley.edu](mailto:jrlong@berkeley.edu)

## SUPPORTING INFORMATION

### Table of Contents

|                                                                              |     |
|------------------------------------------------------------------------------|-----|
| 1. General Methods.....                                                      | S2  |
| 2. Synthesis.....                                                            | S3  |
| 3. Structural Characterization of Polymers.....                              | S11 |
| 3.1. Elemental Analysis.....                                                 | S11 |
| 3.2. FTIR Spectroscopy.....                                                  | S12 |
| 3.3. Solid-State NMR Spectroscopy.....                                       | S13 |
| 3.4. Scanning Electron Microscopy.....                                       | S19 |
| 3.5. Thermogravimetric Analysis.....                                         | S20 |
| 3.6. Surface Area and Pore Size Distributions.....                           | S21 |
| 4. NH <sub>3</sub> Adsorption.....                                           | S25 |
| 5. Breakthrough Experiments.....                                             | S27 |
| 6. <i>In situ</i> Infrared Spectroscopy.....                                 | S28 |
| 7. Water Isotherm for P1-SO <sub>3</sub> H.....                              | S30 |
| 8. List of Porous Materials and Their NH <sub>3</sub> Uptake Capacities..... | S31 |
| 9. References.....                                                           | S34 |

## 1. General Methods

Starting materials and reagents were purchased from Sigma-Aldrich and used as received without further purification. Tetrakis(4-bromophenyl)methane,<sup>1</sup> **S1**,<sup>2</sup> **S2**,<sup>3</sup> PAF-1,<sup>4</sup> PAF-1-CH<sub>2</sub>Cl,<sup>5</sup> P1-NH<sub>3</sub>Cl,<sup>6</sup> P1-SO<sub>3</sub>H,<sup>7</sup> P2-CO<sub>2</sub>C<sub>9</sub>H<sub>19</sub>,<sup>6</sup> and P2-CO<sub>2</sub>H<sup>6</sup> were prepared following the procedures reported in the literature. All reactions were performed under a nitrogen or argon atmosphere and in dry solvents, unless otherwise stated. Analytical thin-layer chromatography (TLC) was performed on aluminum sheets, precoated with silica gel 60-F<sub>254</sub> (Merck 5554). Flash column chromatography was carried out using silica gel 60 (Silicycle) as the stationary phase. Deuterated solvents were purchased from Cambridge Isotope Laboratories (Andover, MA) and used without further purification. <sup>1</sup>H and <sup>13</sup>C NMR spectra were recorded on a Bruker AV-400 and Bruker AMX 400 spectrometers (400.132 MHz for <sup>1</sup>H and 100.623 MHz for <sup>13</sup>C) at ambient temperature.

<sup>1</sup>H NMR data are reported as follows: chemical shift (multiplicity (br s = broad singlet, s = singlet, d = doublet, dd = doublet of doublets), coupling constants, and integration). Chemical shifts are reported in ppm relative to the signals corresponding to the residual non-deuterated solvents. Electrospray Ionization (ESI) mass spectra were obtained from QB3/Chemistry Mass Spectrometry Facility at the University of California, Berkeley.

Thermal gravimetric analysis (TGA) data was collected at ramp rates of 5 °C/min under flowing nitrogen using a TA Instruments TGA Q5000. Infrared spectra were obtained on a Perkin-Elmer Spectrum 100 Optica FTIR spectrometer furnished with an attenuated total reflectance accessory. Carbon, hydrogen, nitrogen, and sulfur elemental analyses were obtained from the Microanalytical Facility at the University of California, Berkeley. Elemental analyses for chlorine, phosphorus, and oxygen were performed at Galbraith Laboratories.

Scanning electron microscopy (SEM) samples of polymers were prepared by dispersing fine powders into methanol and drop casting onto a silicon chip. To dissipate charge, the samples were sputter coated with approximately 3 nm of Au (Denton Vacuum). Polymers were imaged at 5 keV and 12 μA by field emission SEM (JEOL FSM6430).

Solid-state <sup>1</sup>H-<sup>13</sup>C cross-polarization (CP) spectra were collected on a 7.05 Tesla magnet at <sup>13</sup>C frequency of 75.5 MHz under 10 kHz magic-angle spinning (MAS) condition. A Chemagnetics 4 mm H/X probe and a Tecmag Discovery spectrometer were used. The Hartmann-Hahn condition for CP experiments was obtained on solid adamantane, which is also a secondary reference of <sup>13</sup>C chemical shift (the methylene signal of adamantane was set to 38.48 ppm relative to TMS). Two pulse phase modulation (TPPM) proton decoupling scheme was used. The TPPM angle was 15 degrees and the decoupling field strength was ~60 kHz. A contact time of 10 ms and a pulse delay of 4 s were used in CP experiments. Solid-state <sup>1</sup>H NMR spectra were also collected using the same instrument under 13.5 kHz MAS condition. The <sup>1</sup>H chemical shift was calibrated on adamantane (1.74 ppm relative to TMS). A 90-degree pulse of 3.3 μs and a pulse delay of 4 s were used in <sup>1</sup>H MAS experiments. Experimental <sup>1</sup>H MAS NMR spectra were deconvoluted to show individual peaks.

Gas adsorption isotherms were measured using a Micromeritics ASAP 2020/2420 or 3Flex instruments. Samples were transferred to a pre-weighed glass analysis tube, which was capped with a Transeal, and were evacuated on the degas ports until the outgas rate was less than 3  $\mu$ bar/min. Ultrahigh-purity grade (99.999%) nitrogen and anhydrous ammonia (99.999%) was used for gas adsorption measurements. Ammonia and water isotherms were obtained at 25 °C and 20 °C, respectively, using a water circulator. Nitrogen isotherms were obtained using a 77 K liquid-N<sub>2</sub> bath and used to determine the surface areas and pore volumes using the Micromeritics software, assuming a value of 16.2 Å<sup>2</sup> for the molecular cross-sectional area of N<sub>2</sub>. Pore-size distributions were calculated using the density functional theory method with a QSDFT adsorption branch model of N<sub>2</sub> at 77 K adsorbed in carbon with slit/cylindrical/spherical pores, as implemented in the Quantachrome *VersaWin* software. The activation temperatures for porous polymers, except those mentioned in the following Synthesis section, were: 150 °C for PAF-1, 120 °C for PAF-1-CH<sub>2</sub>Cl, 110 °C for P1-NH<sub>3</sub>Cl, 120 °C for P1-SO<sub>3</sub>H, and 110 °C for P2-CO<sub>2</sub>H.

## 2. Synthesis

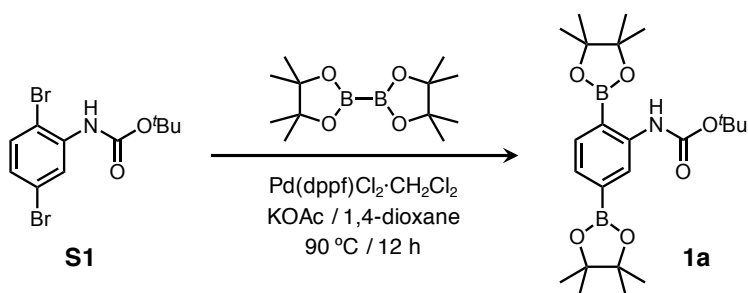

**Scheme S1** Synthesis of compound **1a**

**Synthesis of 1a:** A 100-mL 3-neck round bottomed flask was charged with compound **S1** (2 g, 5.7 mmol), bis(pinacolato)diboron (4.4 g, 17.3 mmol), KOAc (3.4 g, 34.6 mmol), and Pd(dppf)Cl<sub>2</sub>·CH<sub>2</sub>Cl<sub>2</sub> (450 mg, 0.55 mmol) and then equipped with a reflux condenser and rubber stoppers. The solid mixture was subjected to three cycles of brief vacuum/argon (degas/backfill) with no stirring. Anhydrous 1,4-dioxane (50 mL) was quickly transferred into the flask using a syringe under argon atmosphere and the suspension was stirred for 12 h at 90 °C. After confirming the completion of reaction by TLC (EtOAc/Hexanes 5:1), the reaction mixture was cooled down to room temperature and concentrated *in vacuo*. The residual solid was redissolved in CHCl<sub>3</sub> (50 mL), washed with H<sub>2</sub>O (50 mL), dried over MgSO<sub>4</sub>, and suspended over activated carbon for 1 h, after which was filtered through a pad of Celite. The solvent was removed under reduced pressure and remaining solid was briefly washed with EtOAc and MeOH to deliver compound **1a** as a pale yellow powder (1.5 g, 59%). <sup>1</sup>H NMR (CDCl<sub>3</sub>, 400 MHz, 298 K):  $\delta$  = 8.60 (br s, 1H), 8.51 (s, 1H), 7.70 (d, *J* = 7.4 Hz, 1H), 7.40–7.00 (d, *J* = 7.4 Hz, 1H), 1.53 (s, 9H), 1.36 (s, 12H), 1.33 (s, 12H); <sup>13</sup>C NMR (CDCl<sub>3</sub>, 101 MHz, 298 K):  $\delta$  = 153.07, 144.53, 135.33, 127.68, 123.58, 84.28, 83.85, 79.61, 28.41, 24.89; HRMS (ESI) *m/z* calcd 468.2699 for C<sub>23</sub>H<sub>37</sub>O<sub>6</sub>NB<sub>2</sub>Na [*M*+Na]<sup>+</sup>, found 468.2701.

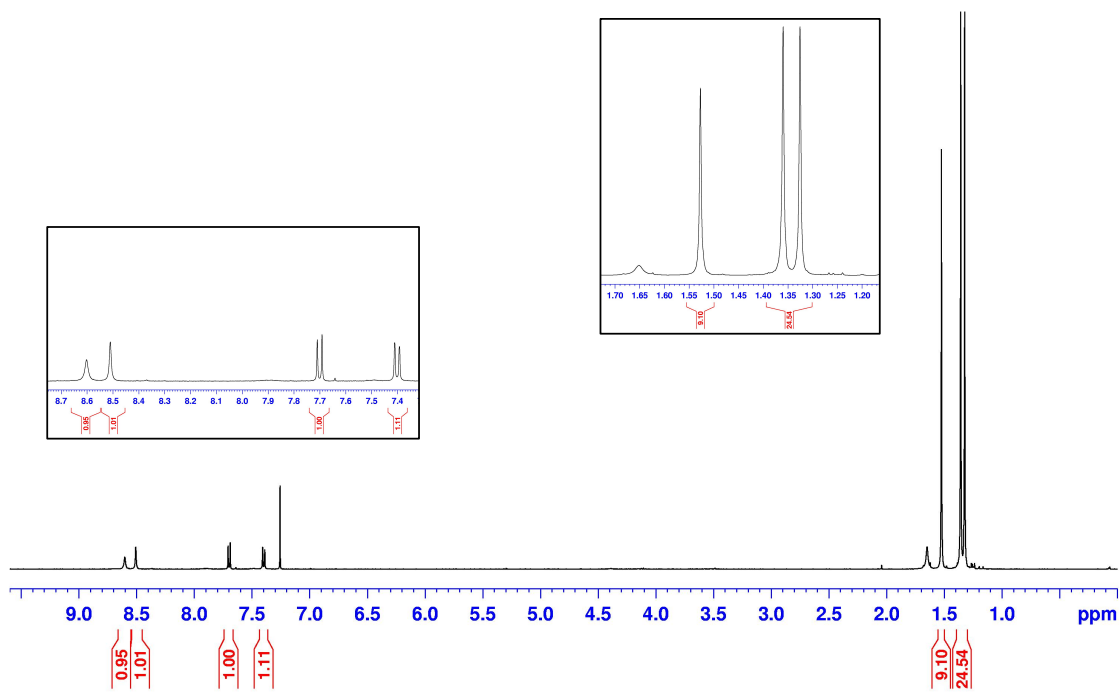

Fig. S1  $^1\text{H}$  NMR spectrum of **1a** recorded in  $\text{CDCl}_3$ .

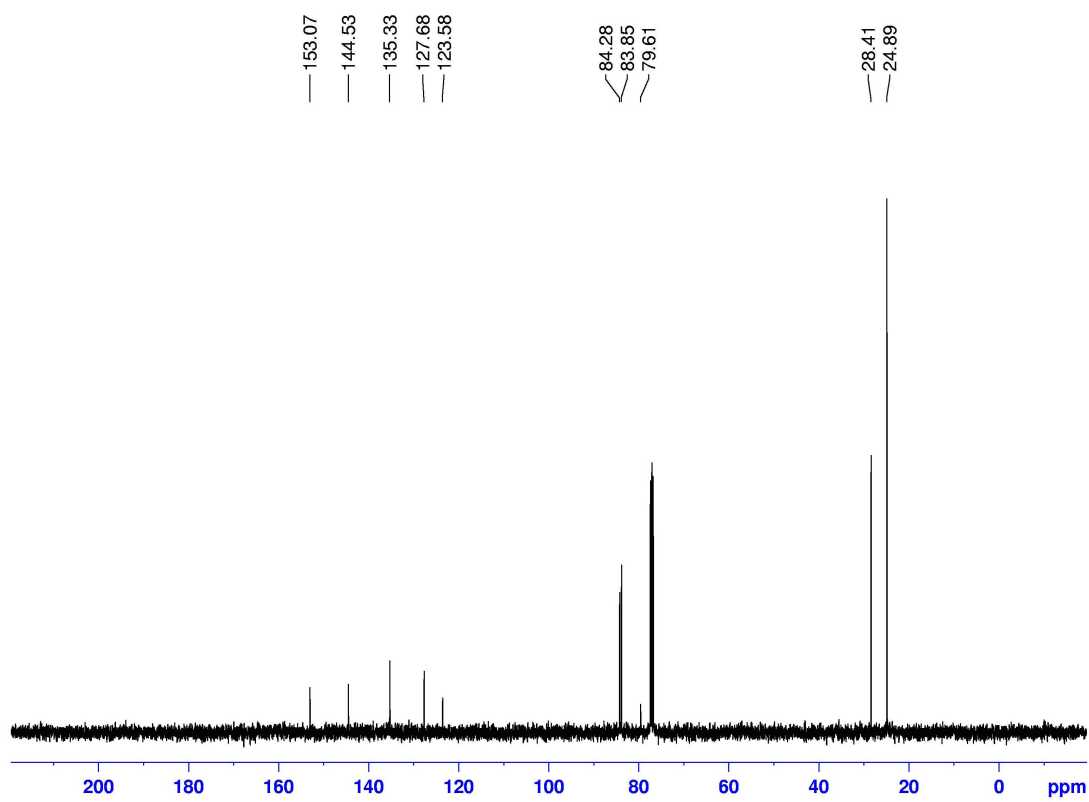

Fig. S2  $^{13}\text{C}$  NMR spectrum of **1a** recorded in  $\text{CDCl}_3$ .

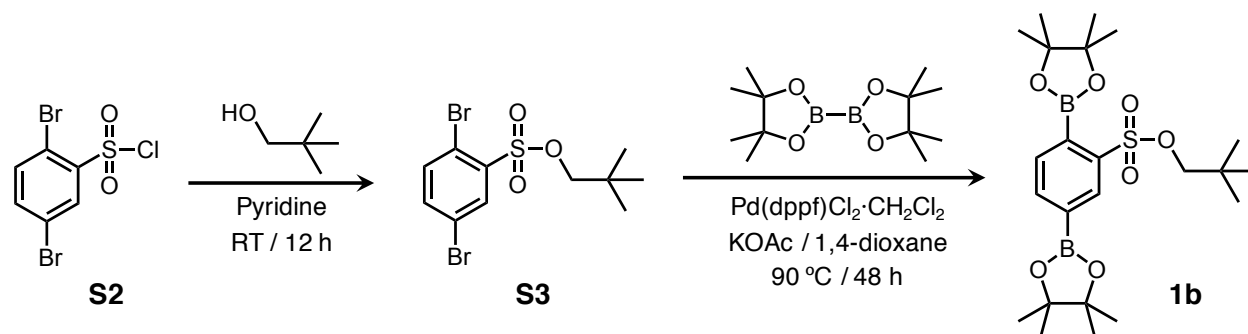

**Scheme S2** Synthesis of compound **1b**

**Synthesis of S3:** The procedure was adopted from a literature report.<sup>8</sup> Compound **S2** (5 g, 15.0 mmol) and neopentyl alcohol (1.58 g, 17.9 mmol) were dissolved in  $\text{CH}_2\text{Cl}_2$  (25 mL) and cooled to 0 °C in an ice-water bath. Then, pyridine (2.5 mL, 30.0 mmol) was added dropwise over a period of 30 min. The reaction mixture was allowed to stir at room temperature for 12 h and diluted with  $\text{Et}_2\text{O}$ . The organic layer was washed with 0.1% HCl followed by brine and then dried over  $\text{MgSO}_4$ . After removing the solvent *in vacuo*, recrystallization of the crude product in EtOH provided **S3** as a colorless crystalline solid (3.7 g, 64%).  $^1\text{H NMR}$  ( $\text{CDCl}_3$ , 400 MHz, 298 K):  $\delta$  = 8.24 (d,  $J$  = 2.3 Hz, 1H), 7.65 (d,  $J$  = 8.4 Hz, 1H), 7.59 (dd,  $J$  = 8.4, 2.3 Hz, 1H), 3.77 (s, 2H), 0.98 (s, 9H);  $^{13}\text{C NMR}$  ( $\text{CDCl}_3$ , 101 MHz, 298 K):  $\delta$  = 137.51, 136.96, 134.64, 121.42, 119.48, 81.01, 31.80, 26.13; HRMS (ESI)  $m/z$  calcd 312.8175 for  $\text{C}_6\text{H}_3\text{O}_3\text{Br}_2\text{S} [M-\text{C}_5\text{H}_{11}]^-$ , found 312.8176.

**Synthesis of 1b:** A 100-mL 3-neck round bottomed flask were charged with compound **S3** (1.5 g, 3.9 mmol), bis(pinacolato)diboron (2.96 g, 11.7 mmol), KOAc (2.25 g, 22.9 mmol), and  $\text{Pd(dppf)Cl}_2\cdot\text{CH}_2\text{Cl}_2$  (350 mg, 0.43 mmol) and then equipped with a reflux condenser and rubber stoppers. The solid mixture was subjected to three cycles of brief vacuum/argon (degas/backfill) with no stirring. Anhydrous 1,4-dioxane (40 mL) was quickly transferred into the flask using a syringe under argon atmosphere and the suspension was stirred for 48 h at 90 °C. After confirming the completion of reaction by TLC, the reaction mixture was cooled down to room temperature and concentrated *in vacuo*. The residual solid was redissolved in  $\text{CHCl}_3$  (50 mL), washed with  $\text{H}_2\text{O}$  (50 mL), dried over  $\text{MgSO}_4$ , and suspended over activated carbon for 1 h, after which was filtered through a pad of Celite. The solvent was removed under reduced pressure, followed by the addition of MeOH and the flask was placed in a -30 °C freezer to induce precipitation. The product **1b** was collected by filtration as a yellow powder (0.8 g, 43%).  $^1\text{H NMR}$  ( $\text{CDCl}_3$ , 400 MHz, 298 K):  $\delta$  = 8.35 (s, 1H), 7.97 (dd,  $J$  = 7.4, 0.8 Hz, 1H), 7.57 (d,  $J$  = 7.4 Hz, 1H), 3.76 (s, 2H), 1.40 (s, 12H), 1.36 (s, 12H), 0.92 (s, 9H);  $^{13}\text{C NMR}$  ( $\text{CDCl}_3$ , 101 MHz, 298 K):  $\delta$  = 138.40, 138.34, 134.16, 132.57, 84.74, 84.43, 79.56, 31.70, 26.08, 24.90; HRMS (ESI)  $m/z$  calcd 503.2417 for  $\text{C}_{23}\text{H}_{38}\text{O}_7\text{B}_2\text{SNa} [M+\text{Na}]^+$ , found 503.2419.

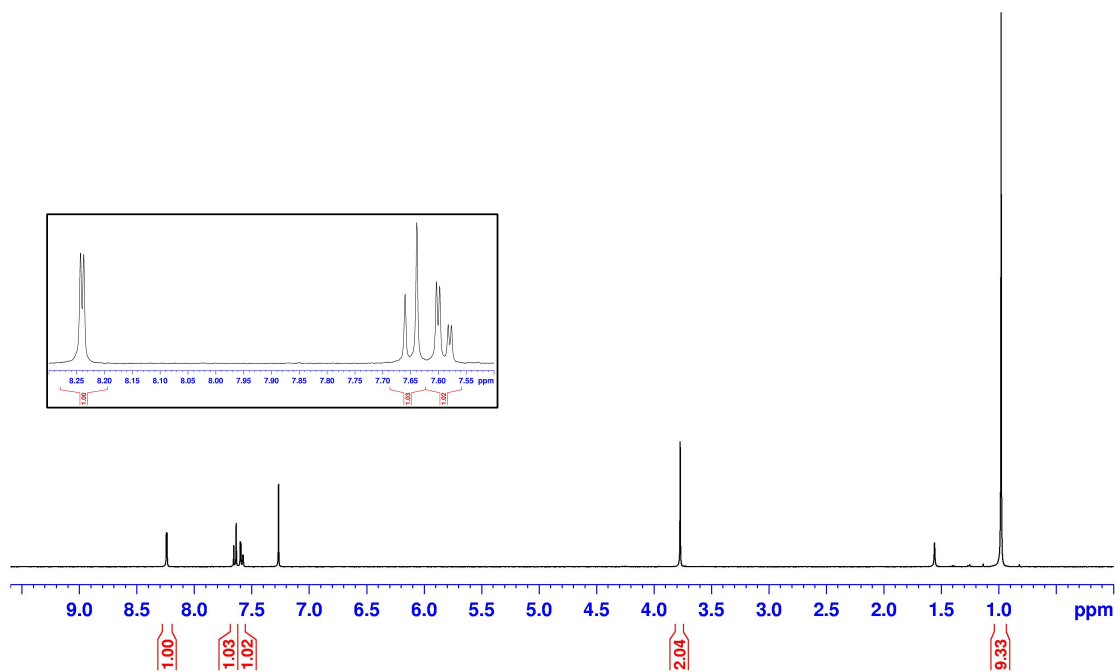

Fig. S3  $^1\text{H}$  NMR spectrum of S3 recorded in  $\text{CDCl}_3$ .

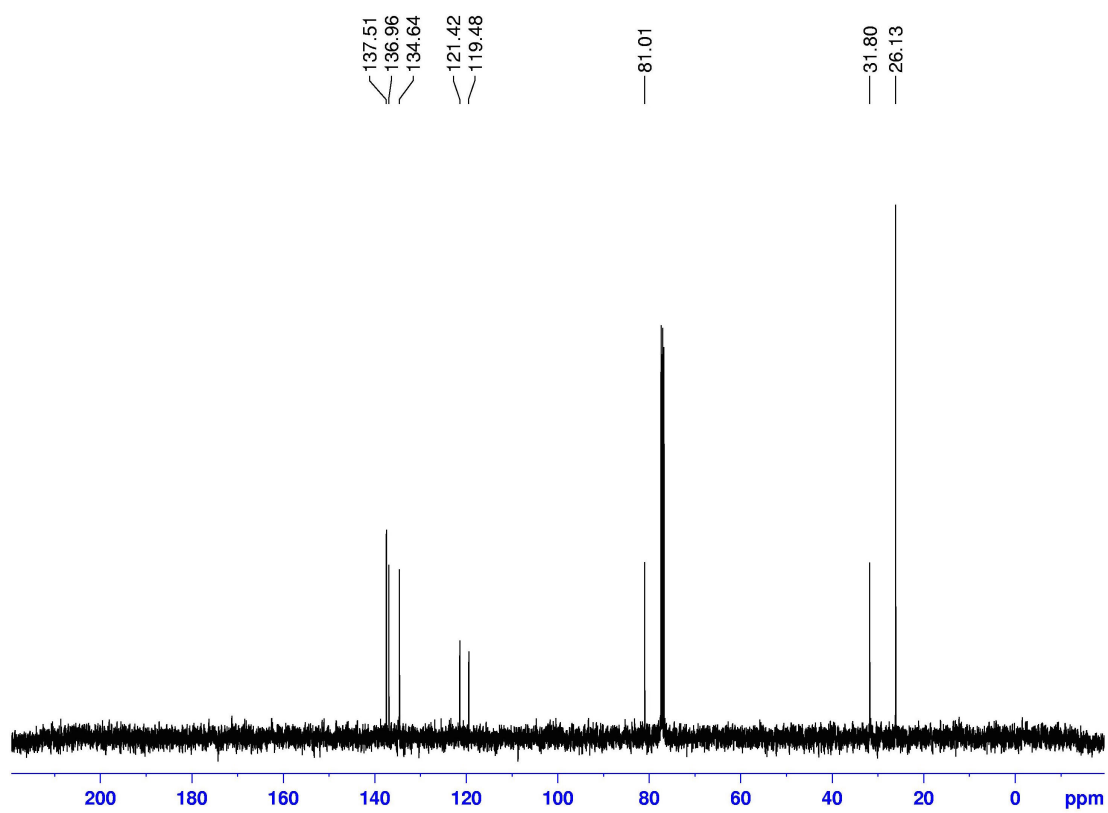

Fig. S4  $^{13}\text{C}$  NMR spectrum of S3 recorded in  $\text{CDCl}_3$ .

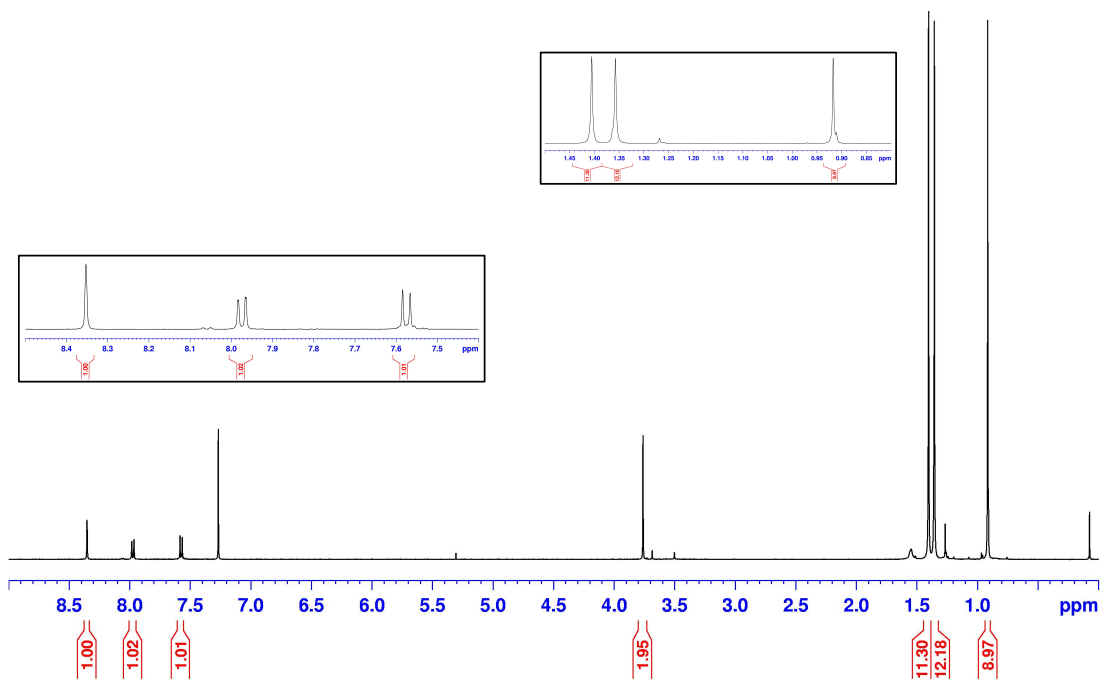

Fig. S5  $^1\text{H}$  NMR spectrum of **1b** recorded in  $\text{CDCl}_3$ .

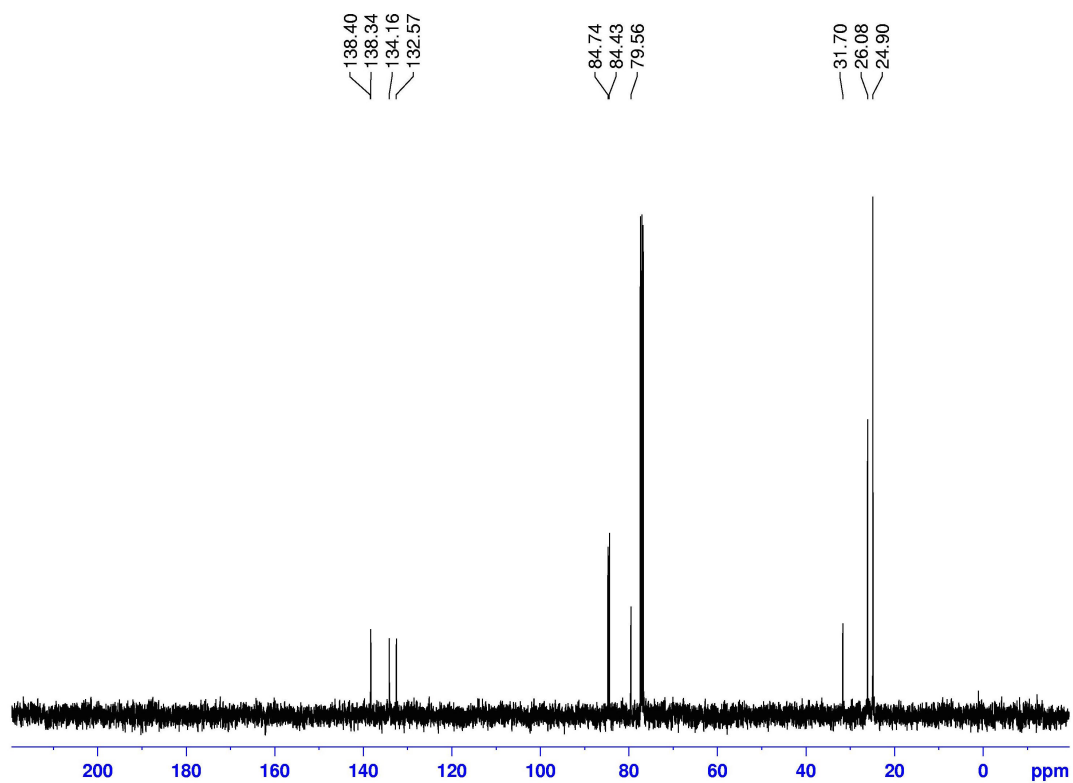

Fig. S6  $^{13}\text{C}$  NMR spectrum of **1b** recorded in  $\text{CDCl}_3$ .

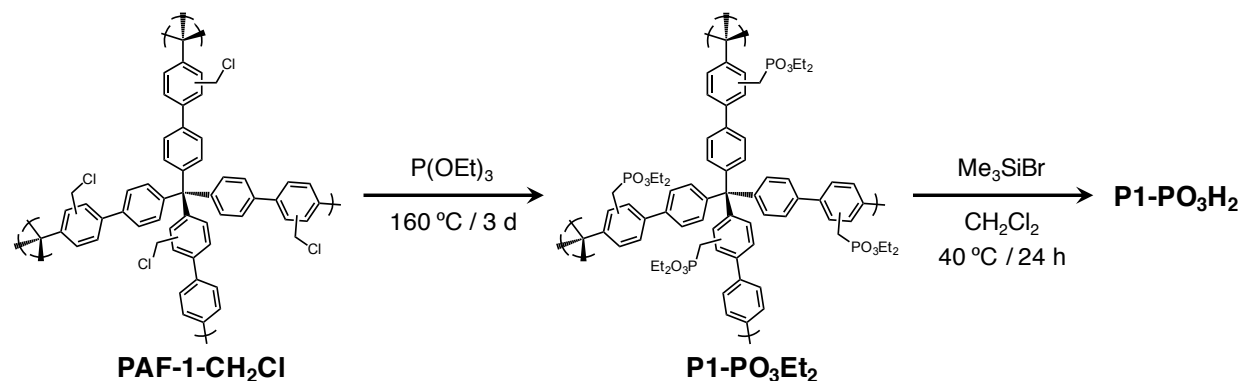

**Scheme S3** Synthesis of polymers P1-PO<sub>3</sub>Et<sub>2</sub> and P1-PO<sub>3</sub>H<sub>2</sub>

**Synthesis of P1-PO<sub>3</sub>Et<sub>2</sub>:** A 100-mL pressure tube was charged with PAF-1-CH<sub>2</sub>Cl (200 mg) and subsequently neat triethyl phosphite (P(OEt)<sub>3</sub>, 20 mL). The flask was sealed and heated at 160 °C for 3 days. The resulting solid was collected by filtration and washed extensively with CH<sub>2</sub>Cl<sub>2</sub>, H<sub>2</sub>O, MeOH, and THF. After drying the solid *in vacuo*, P1-PO<sub>3</sub>Et<sub>2</sub> was obtained as a pale yellow powder (300 mg).

**Synthesis of P1-PO<sub>3</sub>H<sub>2</sub>:** An oven-dried 100-mL round bottomed flask charged with P1-PO<sub>3</sub>Et<sub>2</sub> (300 mg) was sealed with a rubber septum, purged with argon, and then filled with 15 mL of anhydrous CH<sub>2</sub>Cl<sub>2</sub>. Bromotrimethylsilane (Me<sub>3</sub>SiBr, 3 mL, 20 equiv. of phosphonate esters based on elemental analysis data) was added dropwise over 10 min. The resulting suspension was stirred at 40 °C for 24 h, after which the mixture was filtered to remove solvent and unreacted Me<sub>3</sub>SiBr, and then washed with CH<sub>2</sub>Cl<sub>2</sub>. The isolated solid was transferred into a 100-mL round bottomed flask again containing 50 mL of MeOH and was stirred for 6 h at room temperature. After removing solvent by filtration, the remaining solid, 10 mL of H<sub>2</sub>O, and 10 mL of concentrated HCl was mixed in a flask and refluxed for 12 h in order to ensure the complete hydrolysis of phosphonate esters. The solid was collected by filtration, washed extensively with CH<sub>2</sub>Cl<sub>2</sub>, H<sub>2</sub>O, MeOH, and THF, and then dried under reduced pressure to obtain P1-PO<sub>3</sub>H<sub>2</sub> as a yellow powder (203 mg). Prior to gas adsorption measurements, the fully activated sample of P1-PO<sub>3</sub>H<sub>2</sub> was obtained by heating at 110 °C under vacuum.



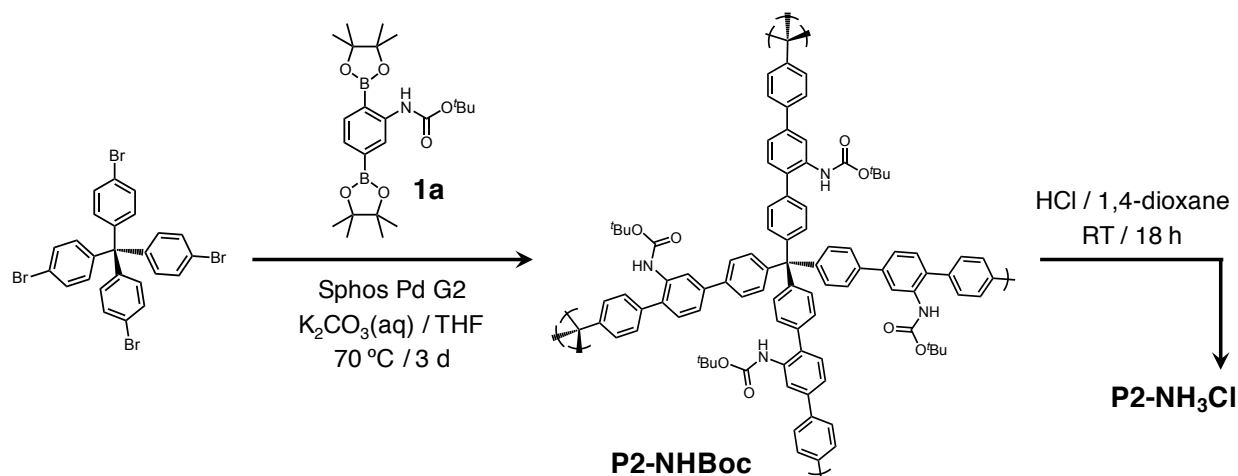

**Scheme S4** Synthesis of polymers P2-NHBoc and P2-NH<sub>3</sub>Cl

**Synthesis of P2-NHBoc:** Tetrakis(4-bromophenyl)methane (500 mg, 0.79 mmol), **1a** (770 mg, 1.73 mmol), and chloro(2-dicyclohexylphosphino-2',6'-dimethoxy-1,1'-biphenyl)[2-(2'-amino-1,1'-biphenyl)]palladium(II) (SPhos Pd G2) (45 mg, 0.062 mmol) were charged into a 100-mL 3-neck round bottomed flask, which was equipped with a reflux condenser and rubber stoppers. The solid mixture was subjected to three cycles of brief vacuum/argon (degas/backfill) with no stirring. Anhydrous THF (25 mL) and degassed aqueous K<sub>2</sub>CO<sub>3</sub> (2 M, 2.5 mL) were transferred into the flask using a syringe under argon atmosphere and the solution was then stirred for 3 days at 70 °C. The reaction became an extremely viscous gel during polymerization. The reaction mixture was cooled down to room temperature and insoluble product was isolated by filtration. Gel-like product turned into powder upon drying and was washed with THF, hot H<sub>2</sub>O, hot EtOH, and hot CHCl<sub>3</sub>. The product was further purified by Soxhlet extraction with THF for 24 h. The isolated solid was activated at 100 °C under vacuum to yield P2-NHBoc as a beige powder (500 mg, 91%).

**Synthesis of P2-NH<sub>3</sub>Cl:** P2-NHBoc (400 mg) was placed into a 100-mL round-bottomed flask containing 30 mL of HCl (4 N in 1,4-dioxane) solution. The suspension was stirred at room temperature for 18 h. The solid was isolated by filtration and washed extensively with 1,4-dioxane and EtOH. The resulting powder was activated under vacuum at 100 °C for 24 h, resulting in P2-NH<sub>3</sub>Cl as a yellow/pale brown solid (300 mg).

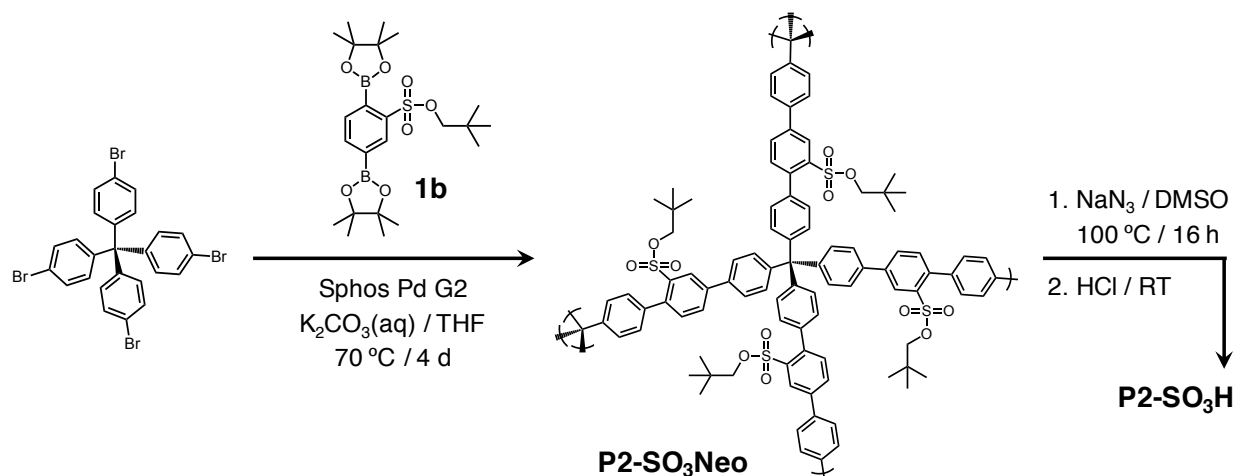

**Scheme S5** Synthesis of polymers P2-SO<sub>3</sub>Neo and P2-SO<sub>3</sub>H

**Synthesis of P2-SO<sub>3</sub>Neo:** Tetrakis(4-bromophenyl)methane (250 mg, 0.39 mmol), **1b** (400 mg, 0.83 mmol), and chloro(2-dicyclohexylphosphino-2',6'-dimethoxy-1,1'-biphenyl)[2-(2'-amino-1,1'-biphenyl)]palladium(II) (SPhos Pd G2) (45 mg, 0.062 mmol) were charged into a 100-mL 3-neck round bottomed flask, which was equipped with a reflux condenser and rubber stoppers. The solid mixture was subjected to three cycles of brief vacuum/argon (degas/backfill) with no stirring. Anhydrous THF (25 mL) and degassed aqueous K<sub>2</sub>CO<sub>3</sub> (2 M, 1.5 mL) were transferred into the flask using a syringe under argon atmosphere and the solution was then stirred for 4 days at 70 °C. The reaction became an extremely viscous gel during polymerization. The reaction mixture was cooled down to room temperature and insoluble product was isolated by filtration. Gel-like product turned into powder upon drying and was washed with THF, hot H<sub>2</sub>O, hot EtOH, and hot CHCl<sub>3</sub>. The product was further purified by Soxhlet extraction with THF for 24 h. The isolated solid was activated at 80 °C under vacuum to yield P2-SO<sub>3</sub>Neo as a beige powder (290 mg, 95%).

**Synthesis of P2-SO<sub>3</sub>H:** A 100-mL round-bottomed flask was charged with P2-SO<sub>3</sub>Neo (290 mg) followed by NaN<sub>3</sub> (730 mg) and DMSO (25 mL). The mixture was left to stir at 100 °C for 16 h, after which the suspension was filtered. The isolated solid was subjected to same conditions with fresh NaN<sub>3</sub>/DMSO for another 16 h. After filtering, the solid was washed with copious amount of H<sub>2</sub>O and suspended in an HCl solution (3 M, 50 mL) at room temperature for 8 h. The solvent was decanted, replaced with 6 M HCl solution (50 mL), and stirred overnight at room temperature. The polymer was filtered and washed extensively with H<sub>2</sub>O, MeOH, and THF. Finally, it was further purified by Soxhlet extraction with THF for 24 h, which yielded P2-SO<sub>3</sub>H as a yellow powder (230 mg). Prior to gas adsorption measurements, the fully activated sample of P2-SO<sub>3</sub>H was obtained by heating at 80 °C under vacuum.

### 3. Structural Characterization of Polymers

#### 3.1. Elemental Analysis

**Table S1** Elemental analysis data of P1 polymers and their intermediates

| %  | PAF-1  |       | P1-NH <sub>3</sub> Cl |       | P1-SO <sub>3</sub> H |       | PAF-1-CH <sub>2</sub> Cl |       | P1-PO <sub>3</sub> Et <sub>2</sub> |       | P1-PO <sub>3</sub> H <sub>2</sub> |       |
|----|--------|-------|-----------------------|-------|----------------------|-------|--------------------------|-------|------------------------------------|-------|-----------------------------------|-------|
|    | Calcd. | Found | Calcd. <sup>a</sup>   | Found | Calcd. <sup>a</sup>  | Found | Calcd. <sup>a</sup>      | Found | Calcd. <sup>b</sup>                | Found | Calcd. <sup>c</sup>               | Found |
| C  | 94.90  | 91.68 | 71.61                 | 75.98 | 63.01                | 61.68 | 78.46                    | 75.77 | 69.26                              | 65.09 | 65.79                             | 55.37 |
| H  | 5.10   | 5.26  | 4.81                  | 4.89  | 3.38                 | 3.46  | 4.39                     | 4.53  | 6.14                               | 6.77  | 4.40                              | 4.98  |
| N  | 0.00   | 0.59  | 6.68                  | 8.33  | 0.00                 | 0.39  | 0.00                     | 0.35  | 0.00                               | 0.25  | 0.00                              | 0.26  |
| S  |        |       |                       |       | 13.46                | 11.99 |                          |       |                                    |       |                                   |       |
| Cl |        |       | 16.90                 | *     |                      |       | 17.15                    | 16.15 | 0.00                               | 0.59  |                                   |       |
| P  |        |       |                       |       |                      |       |                          |       | 9.65                               | 8.78  | 11.69                             | 9.86  |
| O  |        |       |                       |       | 20.15                | *     |                          |       | 14.95                              | *     | 18.12                             | *     |

\*Not measured. <sup>a</sup> Assuming the installation of one functional group per biphenyl linker. <sup>b</sup> Assuming the complete conversion of -CH<sub>2</sub>Cl to -CH<sub>2</sub>PO<sub>3</sub>Et<sub>2</sub> based on the experimentally determined chlorine content of PAF-1-CH<sub>2</sub>Cl. <sup>c</sup> Assuming the complete hydrolysis of phosphonate esters of P1-PO<sub>3</sub>Et<sub>2</sub> based on its calculated values.

**Table S2** Elemental analysis data of P2 polymers

| %  | P2-NHBoc            |       | P2-NH <sub>3</sub> Cl |       | P2-SO <sub>3</sub> Neo |       | P2-SO <sub>3</sub> H |       | P2-CO <sub>2</sub> C <sub>9</sub> H <sub>19</sub> |       | P2-CO <sub>2</sub> H |       |
|----|---------------------|-------|-----------------------|-------|------------------------|-------|----------------------|-------|---------------------------------------------------|-------|----------------------|-------|
|    | Calcd. <sup>a</sup> | Found | Calcd. <sup>b</sup>   | Found | Calcd. <sup>a</sup>    | Found | Calcd. <sup>b</sup>  | Found | Calcd. <sup>a</sup>                               | Found | Calcd. <sup>b</sup>  | Found |
| C  | 80.78               | 75.08 | 77.76                 | 79.70 | 73.41                  | 69.40 | 70.69                | 61.92 | 80.45                                             | 76.58 | 76.39                | 66.07 |
| H  | 6.06                | 6.18  | 4.94                  | 5.33  | 5.77                   | 5.89  | 3.85                 | 4.94  | 8.42                                              | 7.91  | 3.75                 | 4.17  |
| N  | 4.01                | 3.99  | 4.90                  | 4.79  | 0.00                   | 0.00  | 0.00                 | 0.00  | 0.00                                              | 0.00  | 0.00                 | 0.00  |
| S  |                     |       |                       |       | 8.34                   | 8.00  | 10.20                | 8.95  |                                                   |       |                      |       |
| Cl |                     |       | 12.40                 | *     |                        |       |                      |       |                                                   |       |                      |       |
| O  | 9.15                | *     |                       |       | 12.48                  | *     | 15.26                | *     | 11.13                                             | 11.75 | 19.86                | *     |

\*Not measured. <sup>a</sup> Calculated for ideal polymerization. <sup>b</sup> Calculated for the complete removal of protection groups of corresponding ideal polymers.

### 3.2. FTIR Spectroscopy

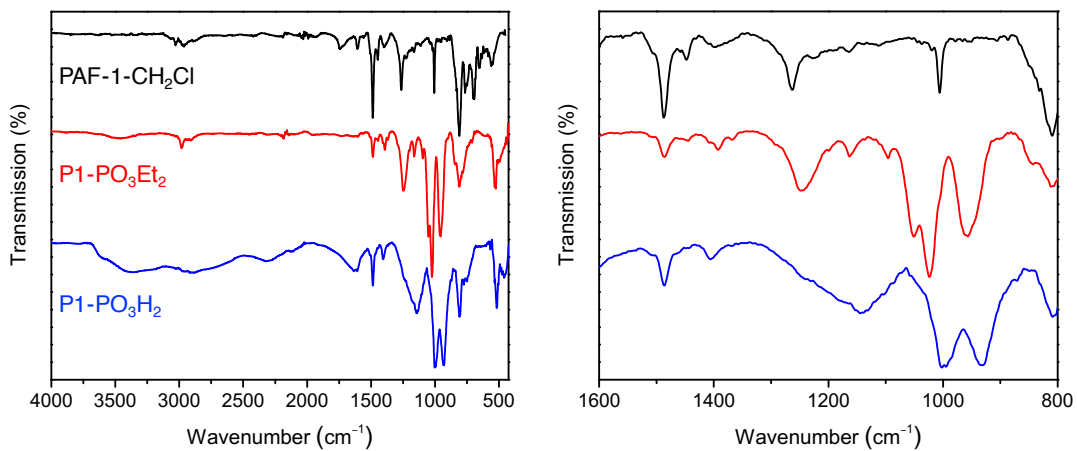

Fig. S7 FTIR-ATR spectra of PAF-1-CH<sub>2</sub>Cl, P1-PO<sub>3</sub>Et<sub>2</sub>, and P1-PO<sub>3</sub>H<sub>2</sub>.

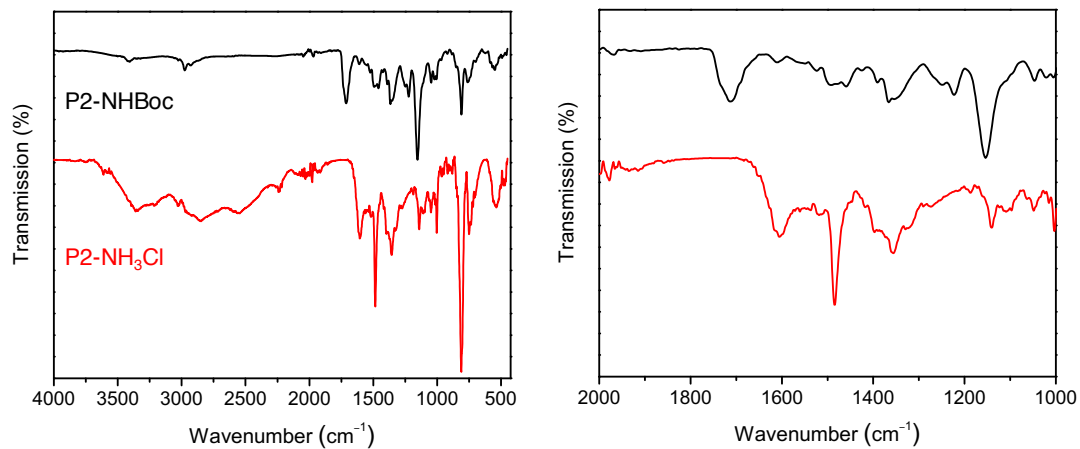

Fig. S8 FTIR-ATR spectra of P2-NHBoc and P2-NH<sub>3</sub>Cl.

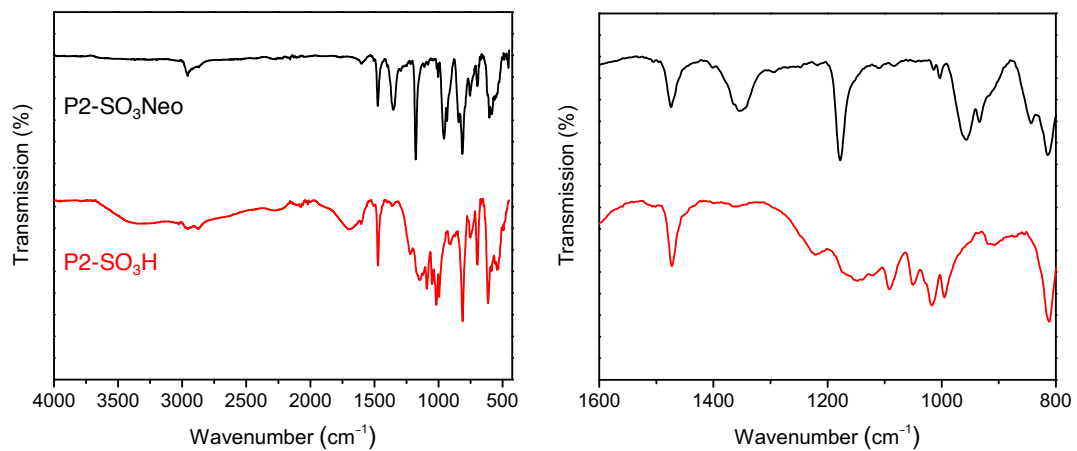

Fig. S9 FTIR-ATR spectra of P2-SO<sub>3</sub>Neo and P2-SO<sub>3</sub>H.

### 3.3. Solid-State NMR Spectroscopy

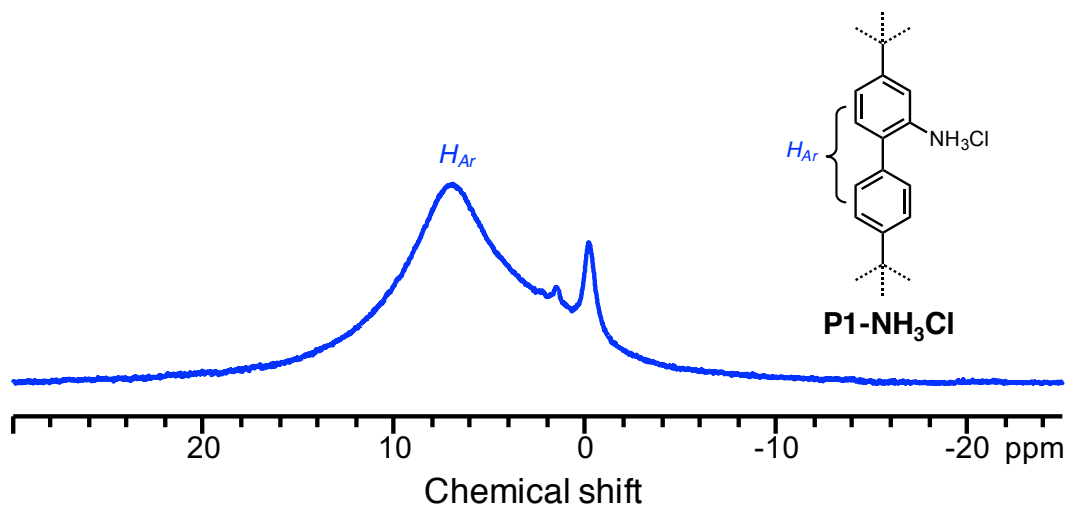

**Fig. S10** Solid-state MAS <sup>1</sup>H NMR spectrum of P1-NH<sub>3</sub>Cl. The chemical shift assignment for aromatic protons is in agreement with the previously reported data in the literature.<sup>4</sup>

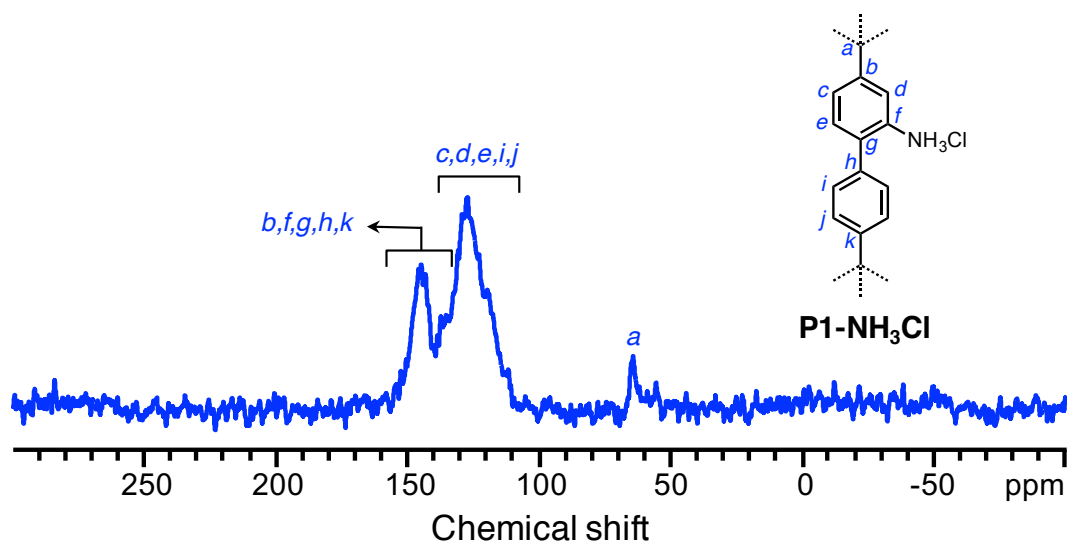

**Fig. S11** Solid-state CP/MAS <sup>13</sup>C NMR spectrum of P1-NH<sub>3</sub>Cl. The chemical shift assignments are in agreement with the previously reported data in the literature.<sup>9-11</sup>

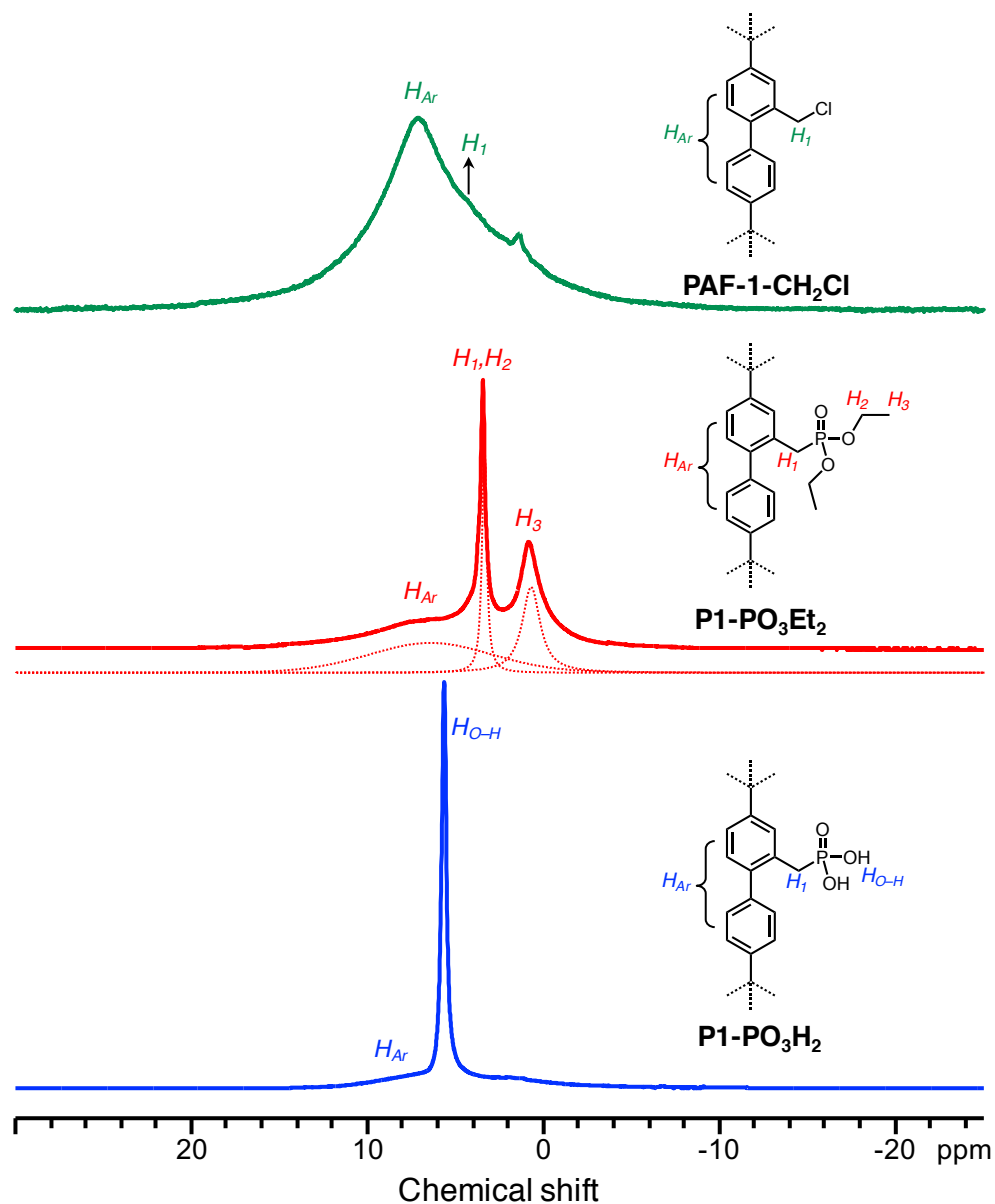

**Fig. S12** Solid-state MAS  $^1\text{H}$  NMR spectra of PAF-1-CH<sub>2</sub>Cl (green), P1-PO<sub>3</sub>Et<sub>2</sub> (red) and P1-PO<sub>3</sub>H<sub>2</sub> (blue). The chemical shift assignments are in agreement with the previously reported data in the literature.<sup>4,12</sup> Dotted lines (red) represent deconvoluted peaks for P1-PO<sub>3</sub>Et<sub>2</sub>, in which the chemical shifts at 0.8 and 3.4 ppm were assigned to  $H_3$  and  $H_1-H_2$ , respectively. The peak associated with  $H_1$  in P1-PO<sub>3</sub>H<sub>2</sub> (blue) is suppressed by the  $H_{O-H}$  peak.

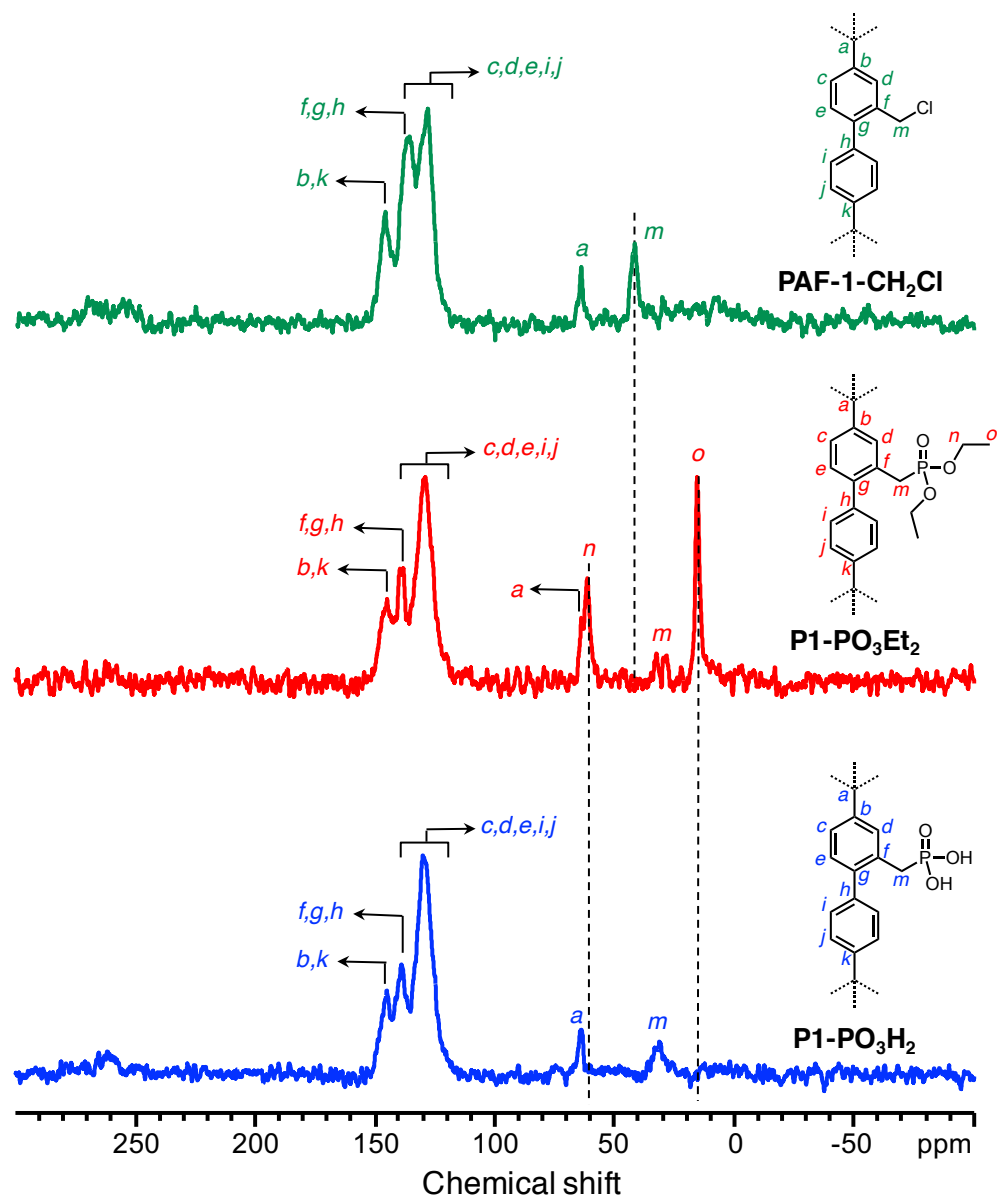

**Fig. S13** Solid-state CP/MAS  $^{13}\text{C}$  NMR spectra of PAF-1-CH<sub>2</sub>Cl (green), P1-PO<sub>3</sub>Et<sub>2</sub> (red) and P1-PO<sub>3</sub>H<sub>2</sub> (blue). The chemical shift assignments are in agreement with the previously reported data in the literature.<sup>9-10,13</sup> The vertical dashed lines represent the disappearance of related chemical shifts upon functionalization of the polymer.

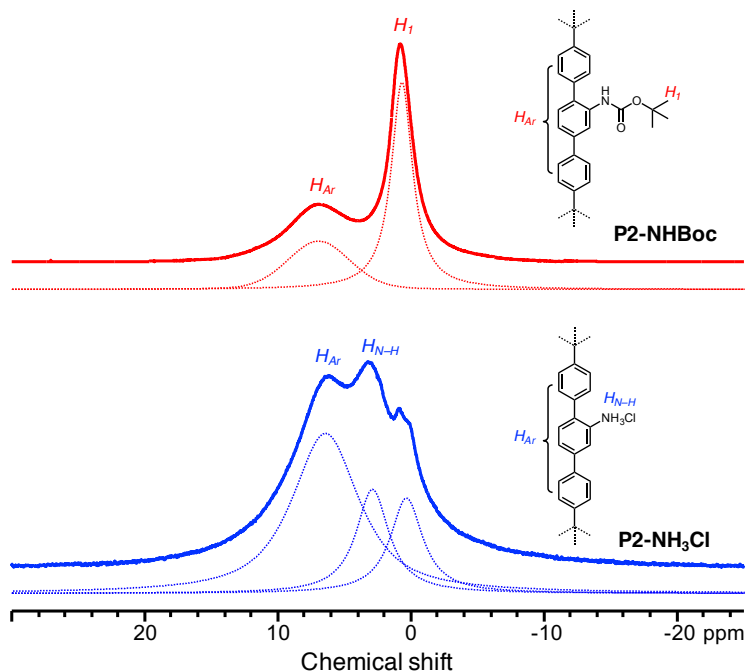

**Fig. S14** Solid-state MAS <sup>1</sup>H NMR spectra of P2-NHBoc (red) and P2-NH<sub>3</sub>Cl (blue). The chemical shift assignments are in agreement with the previously reported data in the literature.<sup>2,4</sup> Dotted lines represent deconvoluted peaks. The peak at 0.8 ppm in P2-NHBoc (red) corresponds to the t-butyl protons, which disappears upon its conversion to P2-NH<sub>3</sub>Cl. The chemical shift at 3.0 ppm in the deconvoluted spectrum P2-NH<sub>3</sub>Cl (blue) is assigned to N-H protons.

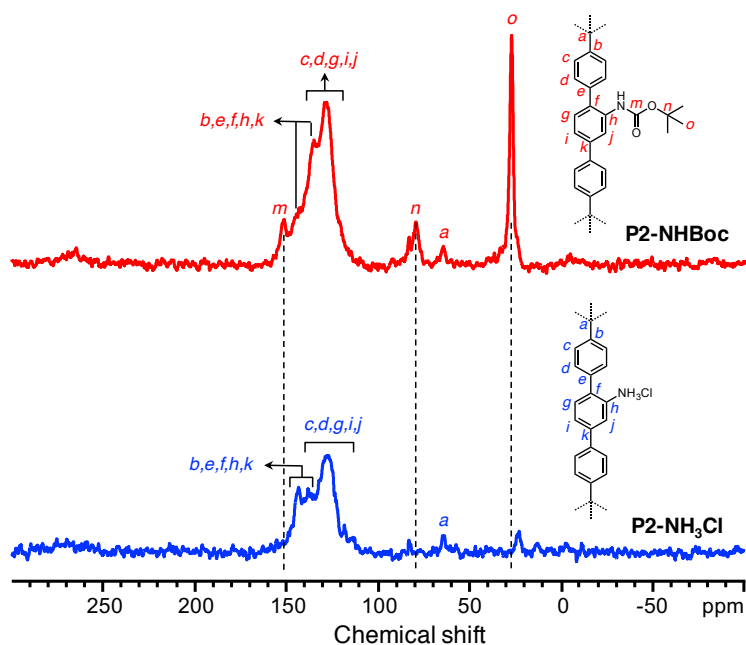

**Fig. S15** Solid-state CP/MAS <sup>13</sup>C NMR spectra of P2-NHBoc (red) and P2-NH<sub>3</sub>Cl (blue). The chemical shift assignments are in agreement with the previously reported data in the literature.<sup>2,10-11</sup> The vertical dashed lines represent the changes in the spectrum upon removal of Boc groups.



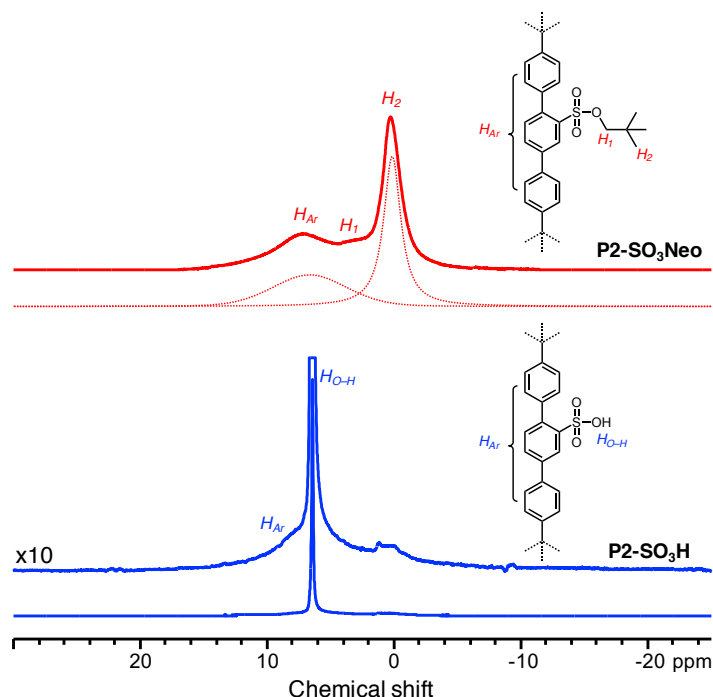

**Fig. S16** Solid-state MAS  $^1\text{H}$  NMR spectra of P2-SO<sub>3</sub>Neo (red) and P2-SO<sub>3</sub>H (blue). The chemical shift assignments are in agreement with the previously reported data in the literature.<sup>4,8</sup> Dotted lines represent deconvoluted peaks. The chemical shift corresponding to  $H_2$  protons at 0.2 ppm in P2-SO<sub>3</sub>Neo disappears upon hydrolysis to P2-SO<sub>3</sub>H.

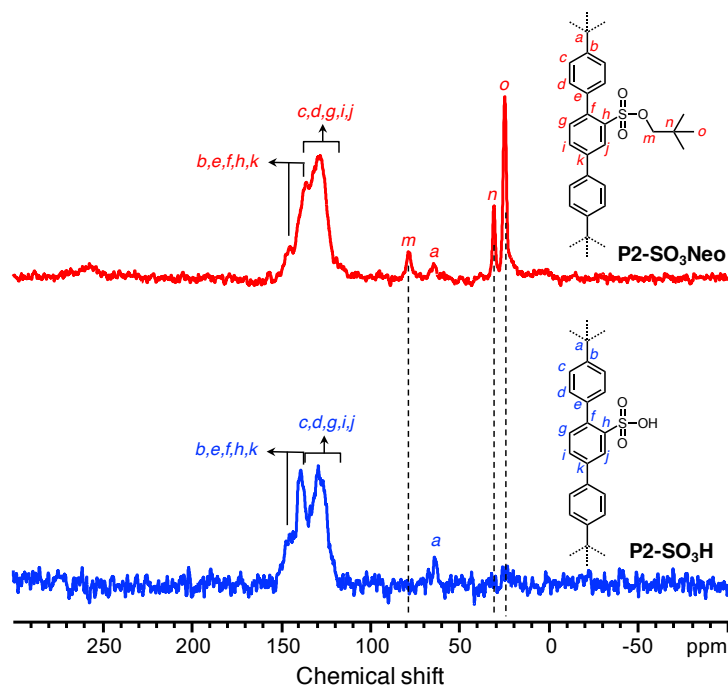

**Fig. S17** Solid-state CP/MAS  $^{13}\text{C}$  NMR spectra of P2-SO<sub>3</sub>Neo (red) and P2-SO<sub>3</sub>H (blue). The chemical shift assignments are in agreement with the previously reported data in the literature.<sup>8,11</sup> The vertical dashed lines indicate the removal of carbon atoms associated with the neopentyl group.

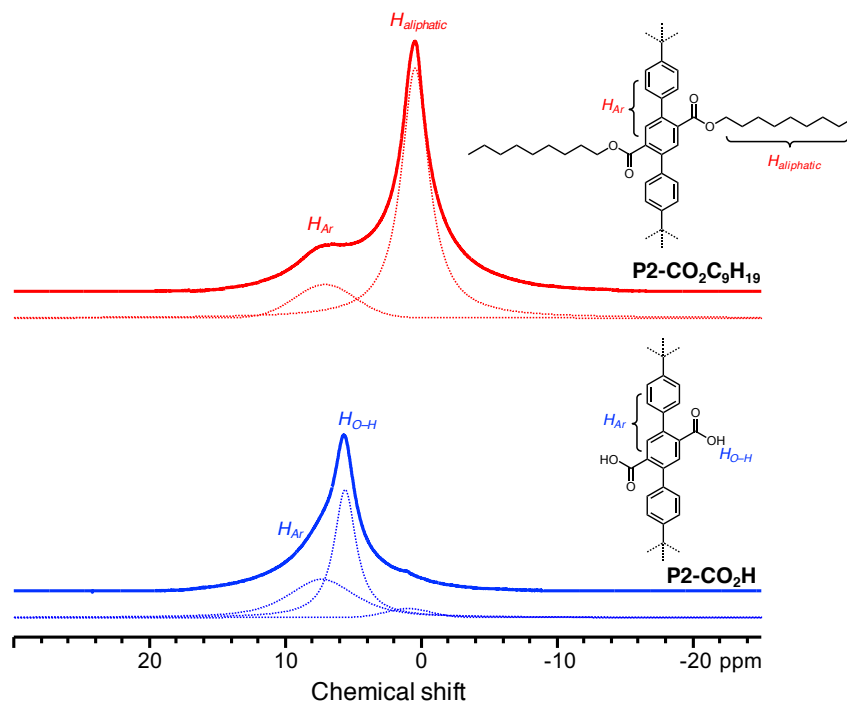

**Fig. S18** Solid-state MAS  $^1\text{H}$  NMR spectra of  $\text{P2-CO}_2\text{C}_9\text{H}_{19}$  (red) and  $\text{P2-CO}_2\text{H}$  (blue). The chemical shift assignments are in agreement with the previously reported data in the literature.<sup>4,14</sup> Dotted lines represent deconvoluted peaks, which revealed the presence of aromatic (7.2 ppm) and aliphatic (0.5 ppm) protons in the case of  $\text{P2-CO}_2\text{C}_9\text{H}_{19}$  as well as the disappearance of aliphatic protons in  $\text{P2-CO}_2\text{H}$ .

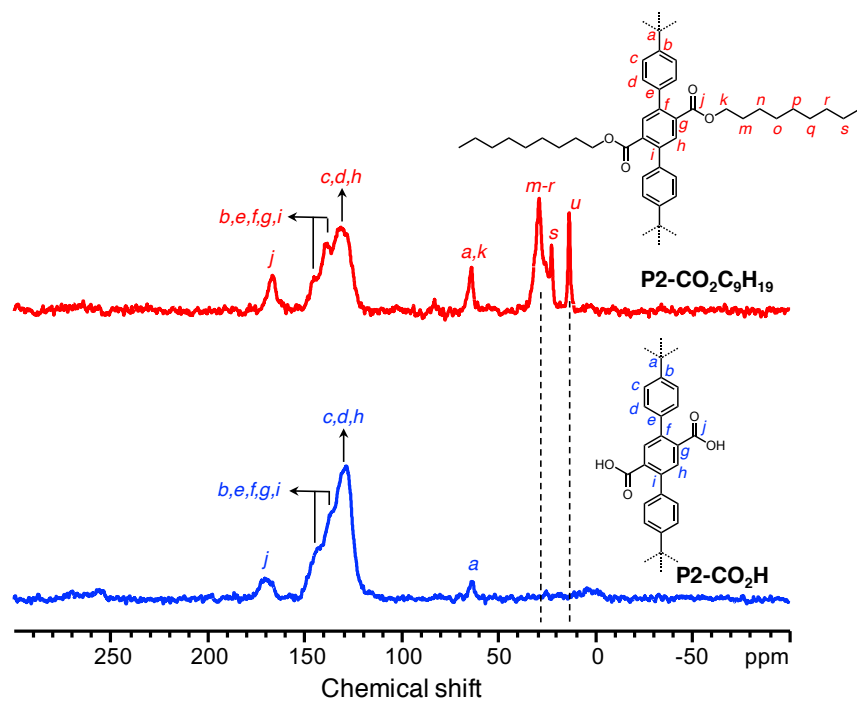

**Fig. S19** Solid-state CP/MAS  $^{13}\text{C}$  NMR spectra of  $\text{P2-CO}_2\text{C}_9\text{H}_{19}$  (red) and  $\text{P2-CO}_2\text{H}$  (blue). The chemical shift assignments are in agreement with the previously reported data in the literature.<sup>14-15</sup> The vertical dashed lines indicate the complete removal of aliphatic side chains upon hydrolysis.

### 3.4. Scanning Electron Microscopy

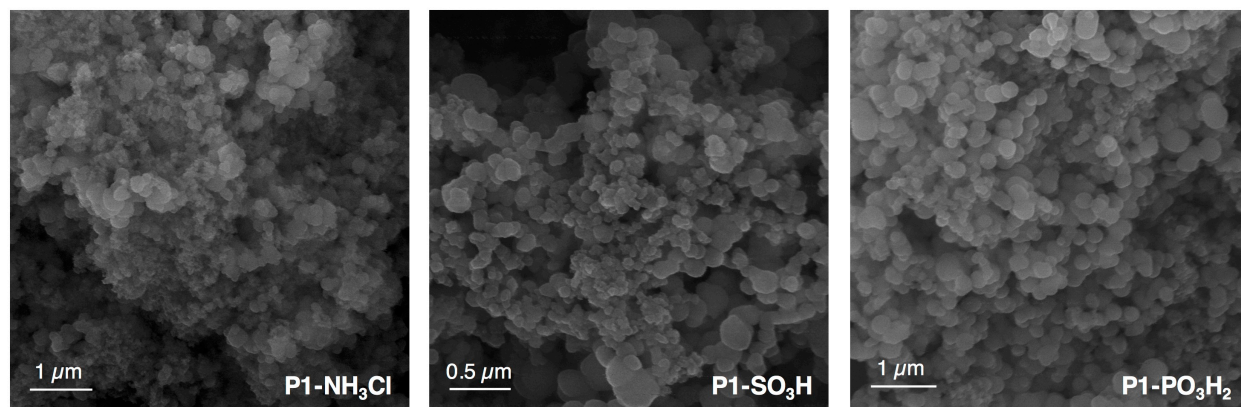

**Fig. S20** SEM images of P1-NH<sub>3</sub>Cl, P1-SO<sub>3</sub>H, and P1-PO<sub>3</sub>H<sub>2</sub>.

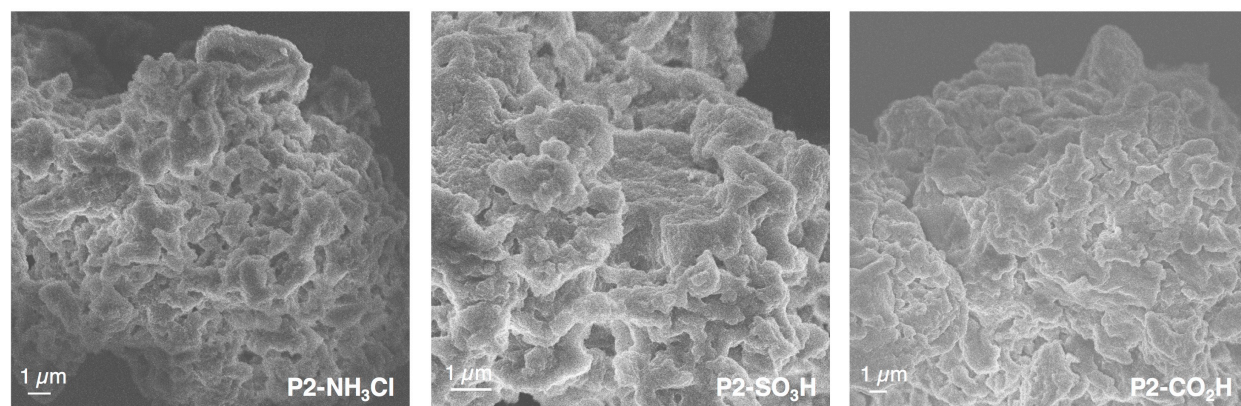

**Fig. S21** SEM images of P2-NH<sub>3</sub>Cl, P2-SO<sub>3</sub>H, and P2-CO<sub>2</sub>H.

### 3.5. Thermogravimetric Analysis

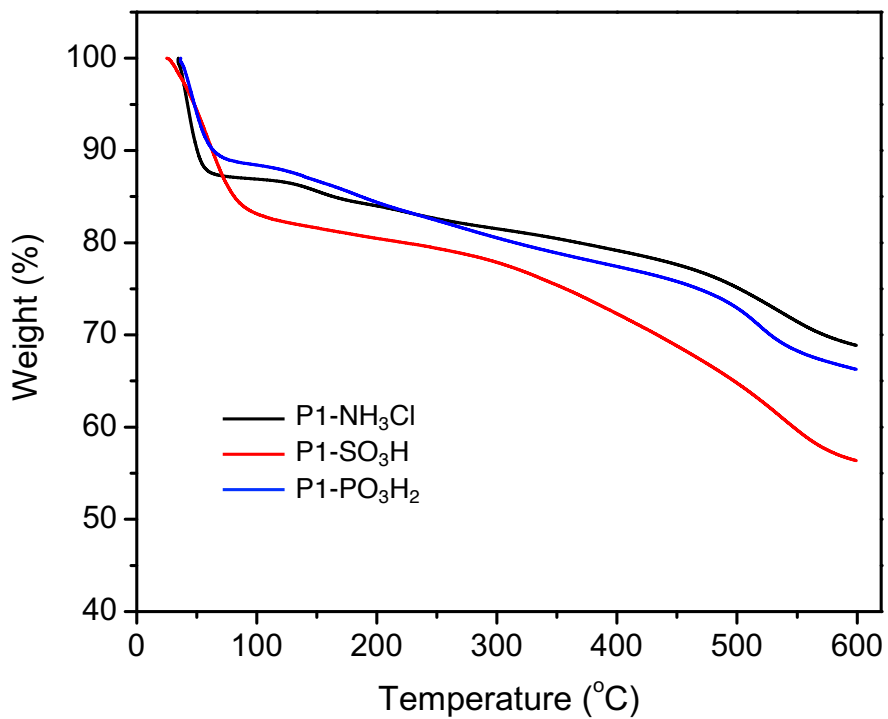

Fig. S22 Thermogravimetric analysis of P1-NH<sub>3</sub>Cl, P1-SO<sub>3</sub>H, and P1-PO<sub>3</sub>H<sub>2</sub>.

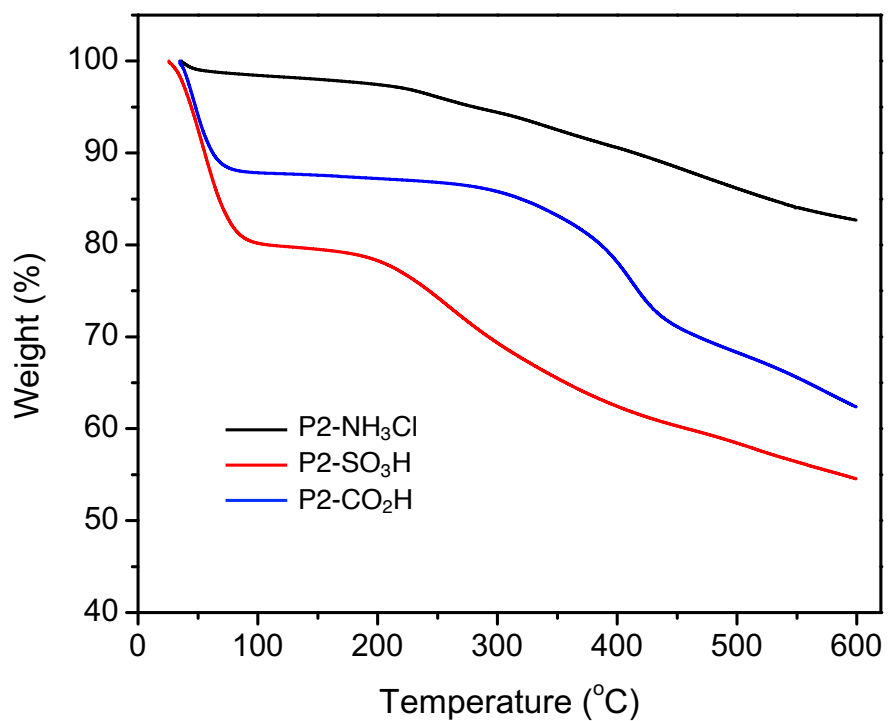

Fig. S23 Thermogravimetric analysis of P2-NH<sub>3</sub>Cl, P2-SO<sub>3</sub>H, and P2-CO<sub>2</sub>H.

### 3.6. Surface Area and Pore Size Distributions

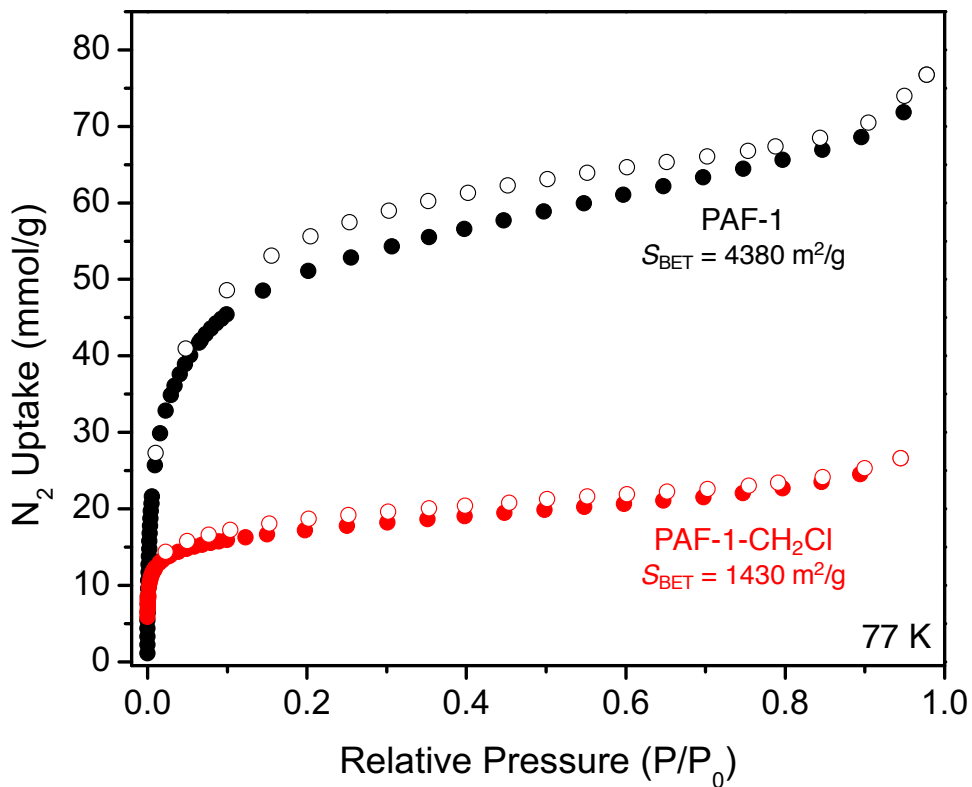

**Fig. S24** Nitrogen adsorption isotherms of PAF-1 and PAF-1-CH<sub>2</sub>Cl used in the synthesis of P1 polymers. Closed and open symbols represent adsorption and desorption branches, respectively.

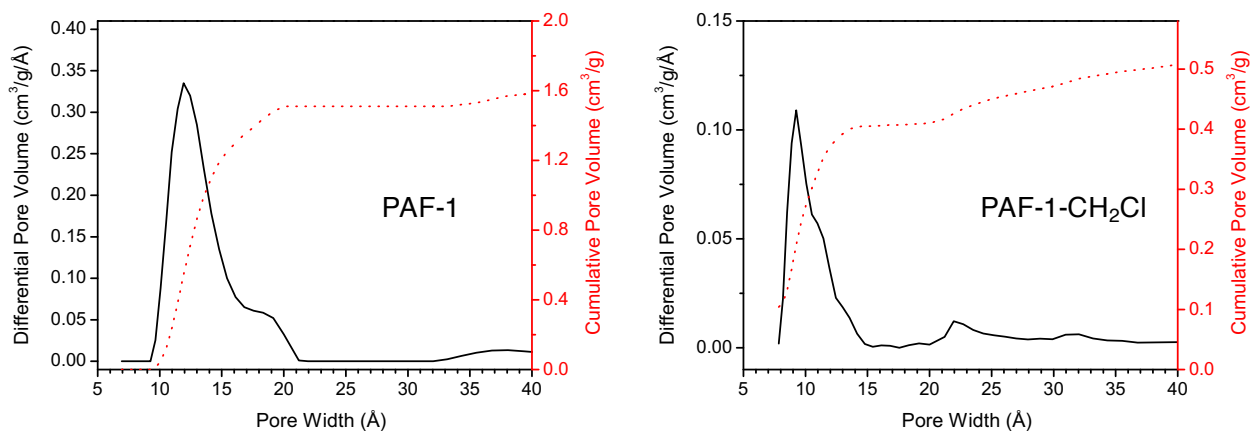

**Fig. S25** Pore size distributions of PAF-1 and PAF-1-CH<sub>2</sub>Cl.

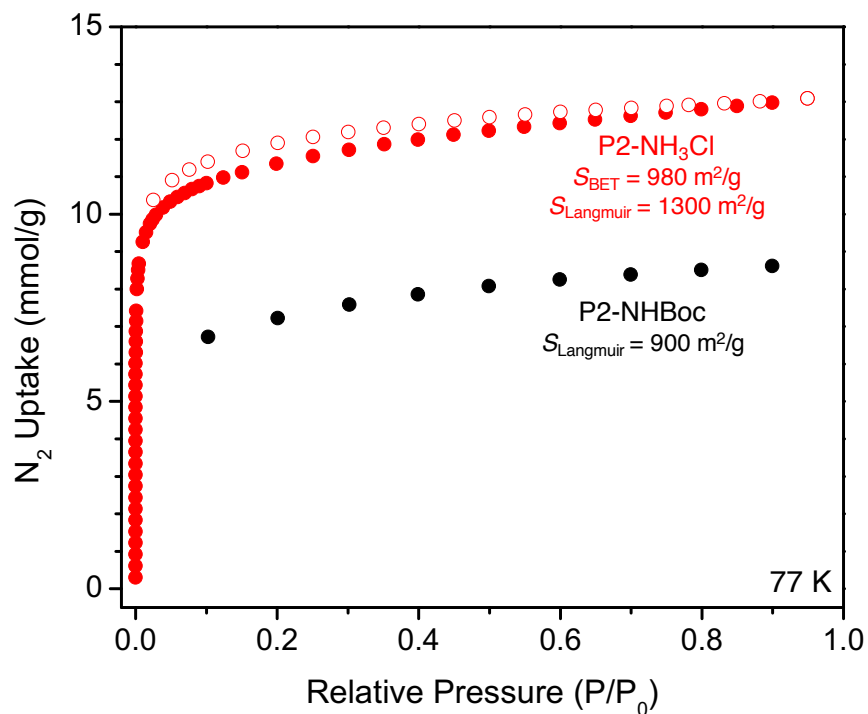

**Fig. S26** Nitrogen adsorption isotherms of P2-NHBoc (before deprotection) and P2-NH<sub>3</sub>Cl (after deprotection). Closed and open symbols represent adsorption and desorption branches, respectively.

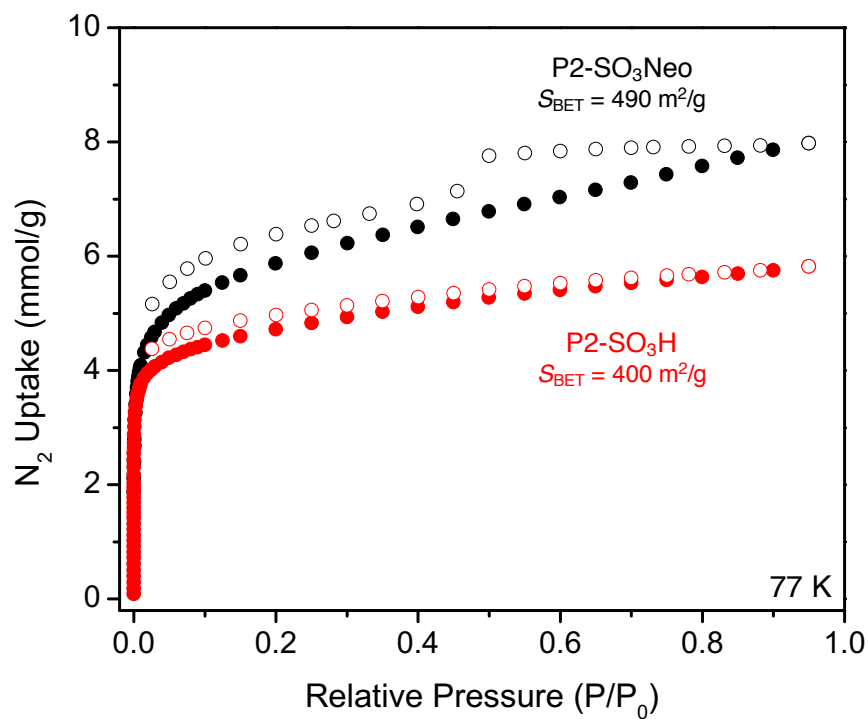

**Fig. S27** Nitrogen adsorption isotherms of P2-SO<sub>3</sub>Neo (before deprotection) and P2-SO<sub>3</sub>H (after deprotection). Closed and open symbols represent adsorption and desorption branches, respectively.

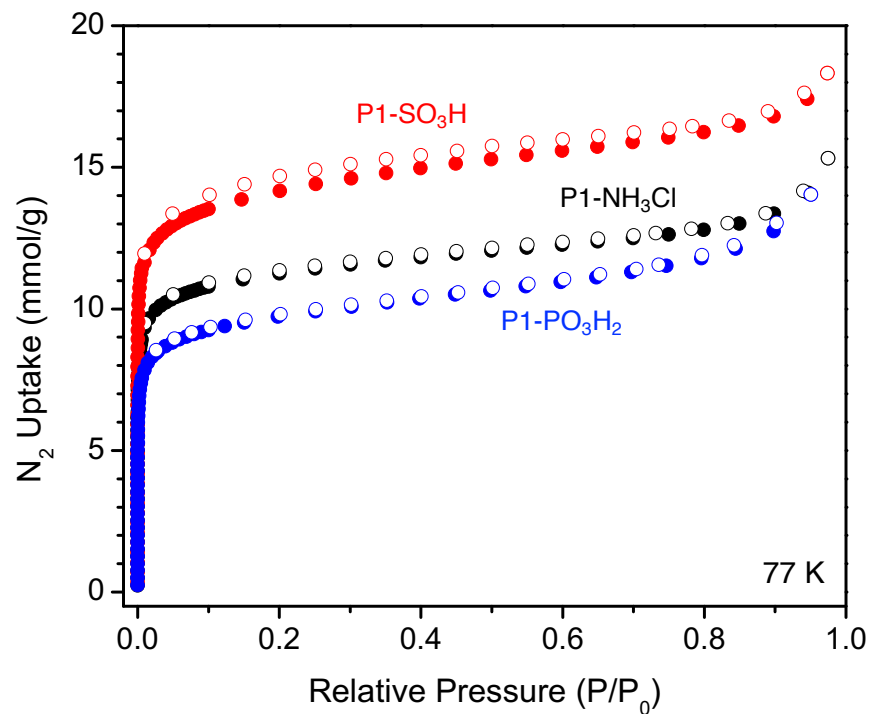

**Fig. S28** Nitrogen adsorption isotherms of P1-NH<sub>3</sub>Cl, P1-SO<sub>3</sub>H, and P1-PO<sub>3</sub>H<sub>2</sub>. Closed and open symbols represent adsorption and desorption branches, respectively.

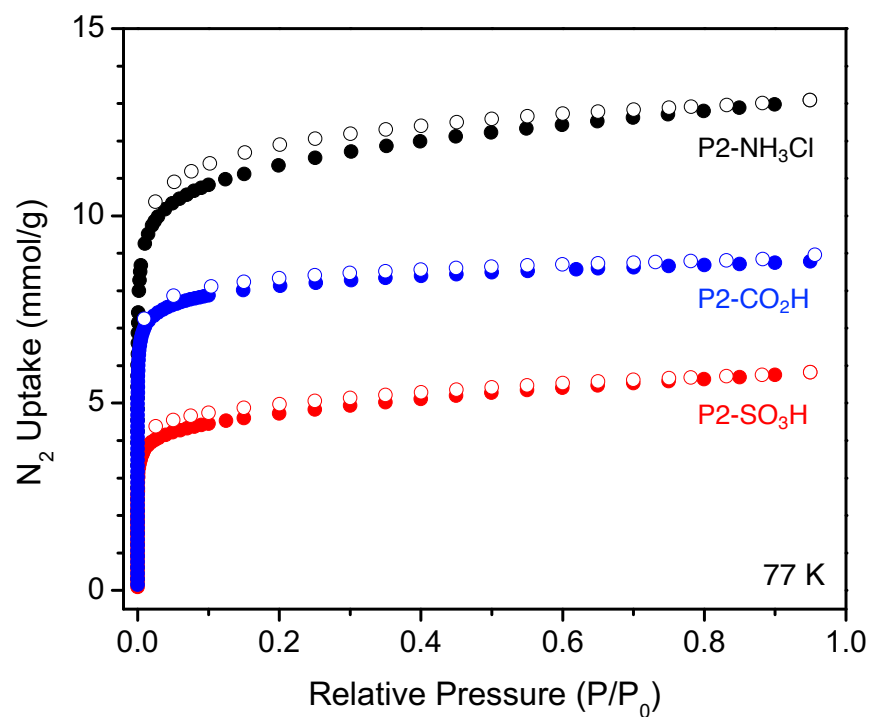

**Fig. S29** Nitrogen adsorption isotherms of P2-NH<sub>3</sub>Cl, P2-SO<sub>3</sub>H, and P2-CO<sub>2</sub>H. Closed and open symbols represent adsorption and desorption branches, respectively.

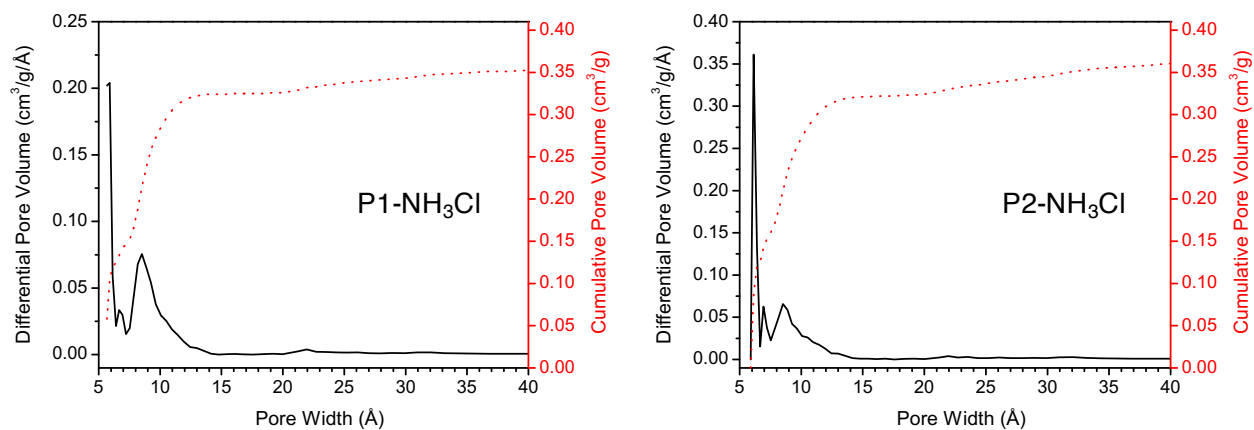

**Fig. S30** Pore size distributions of P1-NH<sub>3</sub>Cl and P2-NH<sub>3</sub>Cl.

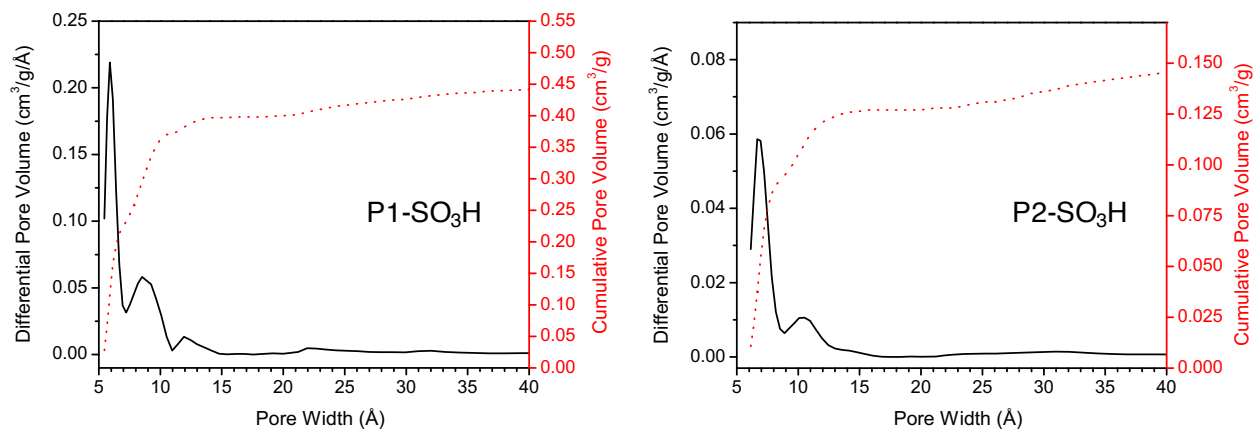

**Fig. S31** Pore size distributions of P1-SO<sub>3</sub>H and P2-SO<sub>3</sub>H.

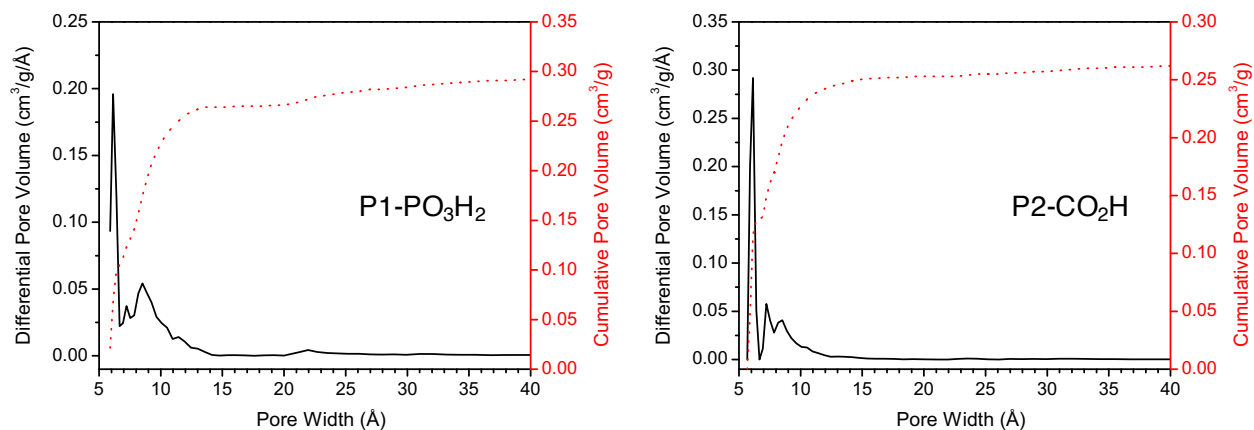

**Fig. S32** Pore size distributions of P1-PO<sub>3</sub>H<sub>2</sub> and P2-CO<sub>2</sub>H.



#### 4. NH<sub>3</sub> Adsorption

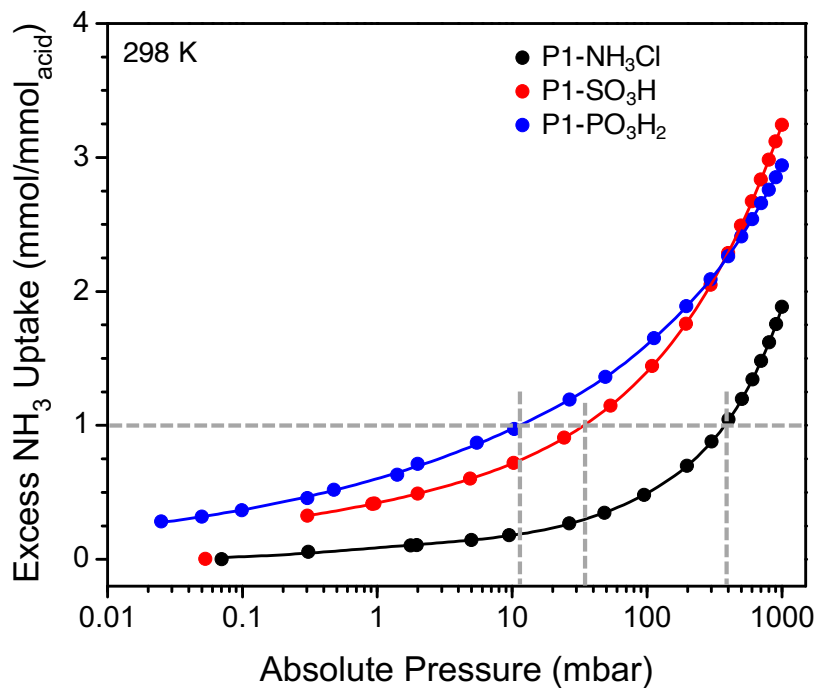

**Fig. S33** NH<sub>3</sub> isotherms of P1 polymers plotted with respect to the density of acidic sites. The intersection of dashed gray lines demonstrates pressure points where one ammonia per acid is achieved.

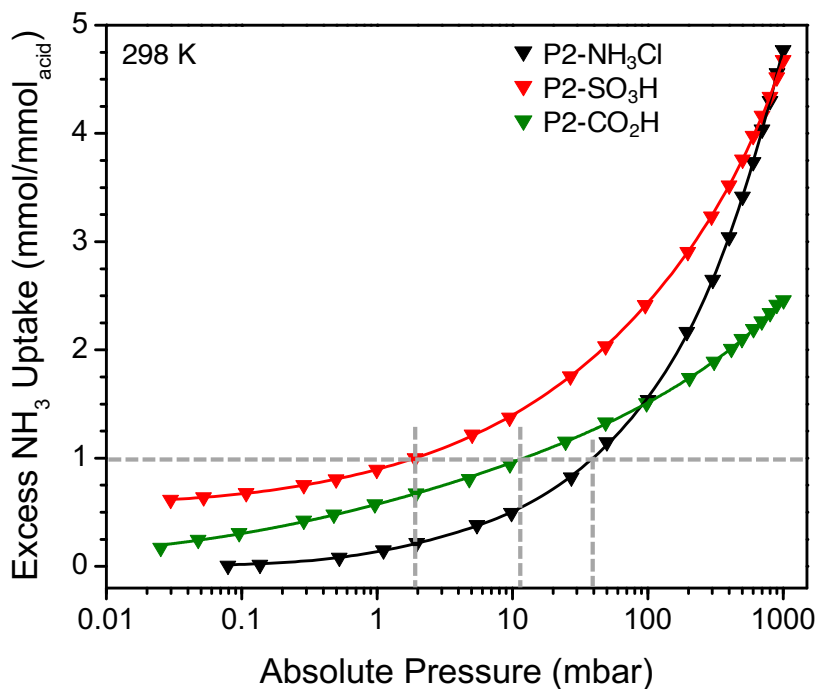

**Fig. S34** NH<sub>3</sub> isotherms of P2 polymers plotted with respect to the density of acidic sites. The intersection of dashed gray lines demonstrates pressure points where one ammonia per acid is achieved.

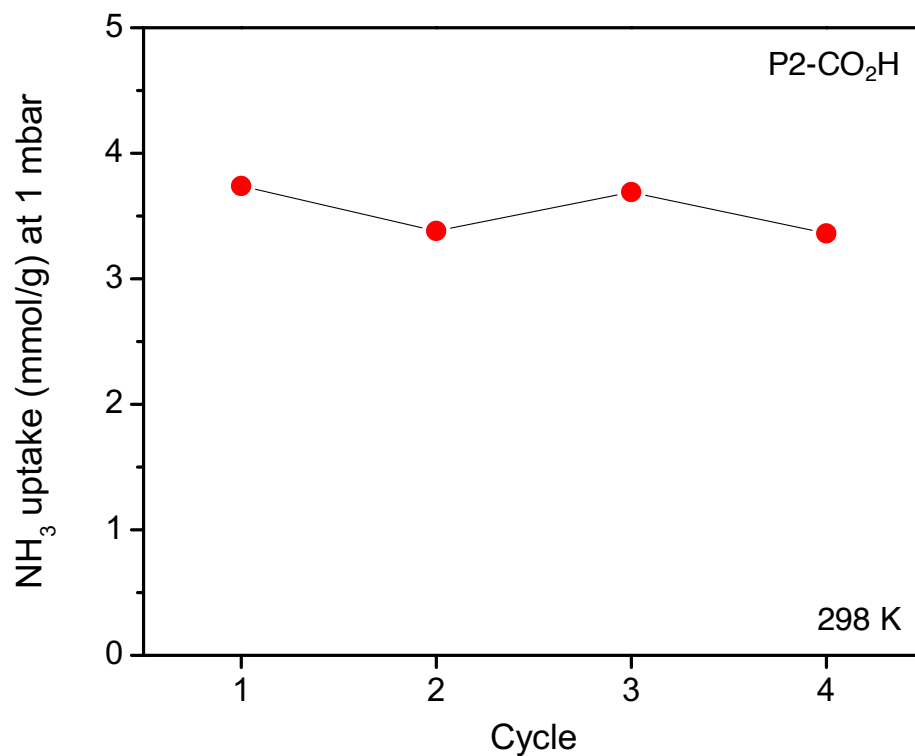

**Fig. S35** Cycling experiments were performed on P2-CO<sub>2</sub>H and NH<sub>3</sub> uptake capacity at 1 mbar was measured in each cycle. The sample was reactivated at 130 °C for 12 h between each cycles.

## 5. Breakthrough Experiments

Breakthrough testing was conducted on porous polymers using a microbreakthrough setup (Fig. S36) that has been described previously.<sup>16-18</sup> Briefly, neat ammonia was injected into a steel canister, which was then pressurized to approximately 15 psig. A stream from this ballast was delivered via mass flow controller and mixed with humidity-controlled stream at a rate necessary to achieve  $2000 \text{ mg/m}^3$ . The mixed stream was delivered at a total flow rate of  $20 \text{ mL/min}$  to a glass-fritted tube submerged in a temperature-controlled bath at  $20 \text{ }^\circ\text{C}$ . Within the  $4 \text{ mm ID}$  tube, polymers were packed to a bed depth of approximately  $4 \text{ mm}$ , resulting in a residence time of approximately  $0.15 \text{ s}$ . Breakthrough was measured on the effluent side of the bed using HP5890 Series II gas chromatographs equipped with a photoionization detector. The effluent curve was integrated to calculate the loading of ammonia.

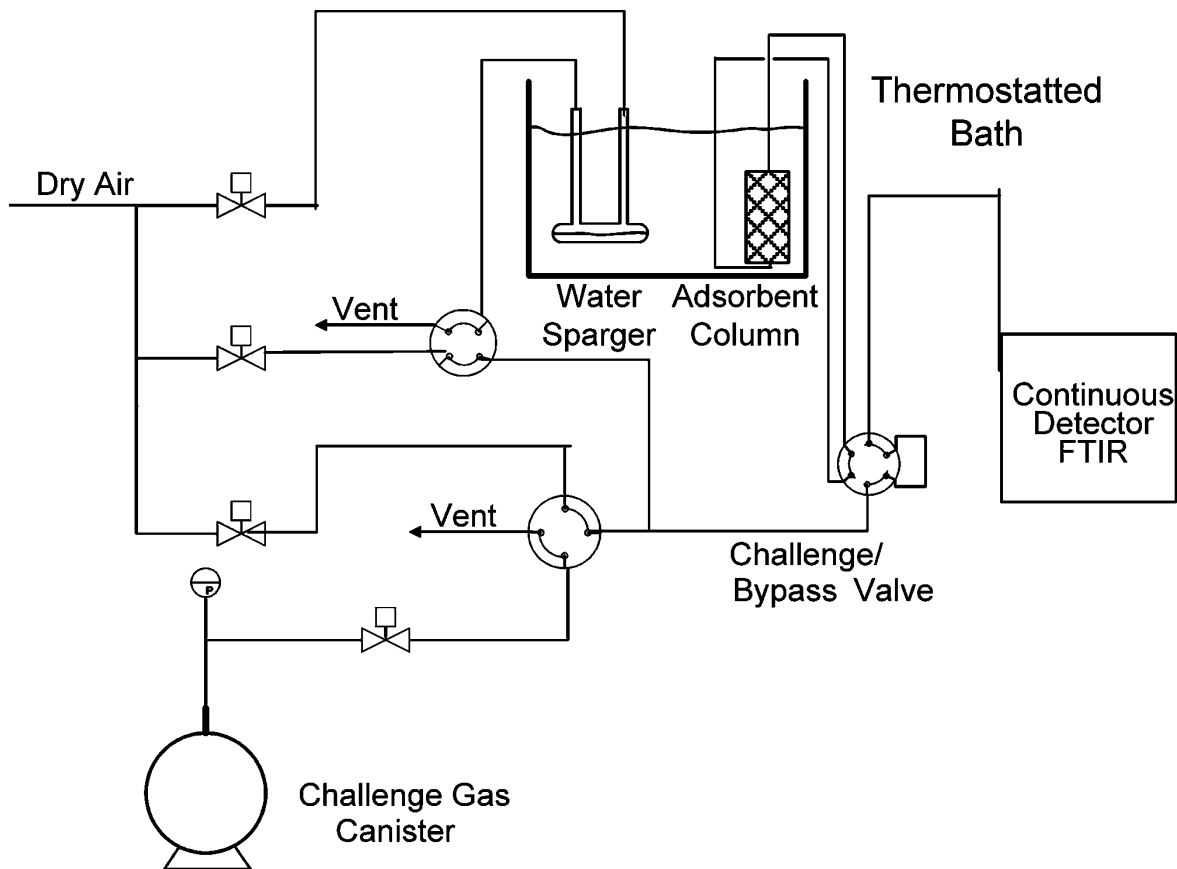

Fig. S36 Microbreakthrough system.

## 6. *In Situ* Infrared Spectroscopy

FTIR spectra were collected at  $2\text{ cm}^{-1}$  resolution on a Bruker Vertex 70 spectrophotometer, equipped with a MCT cryodetector, at “beam temperature”—i.e., the temperature reached by samples under the IR beam. The samples were examined in the form of self-supporting pellets mechanically protected with a pure gold frame (P1-SO<sub>3</sub>H and P1-PO<sub>3</sub>H<sub>2</sub>) or in the form of thin layer depositions on Si wafers, starting from aqueous suspensions (PAF-1 and P2-CO<sub>2</sub>H). Before NH<sub>3</sub> adsorption, all samples were activated in controlled atmosphere, at the corresponding activation temperature, using a home-made quartz IR cell equipped with KBr windows and characterized by a small optical path (2 mm). The cell was connected to a conventional high-vacuum glass line, equipped with mechanical and turbo molecular pumps (capable of a residual pressure  $p < 10^{-4}$  mbar), which allows performing *in situ* adsorption/desorption experiments of molecular probes.

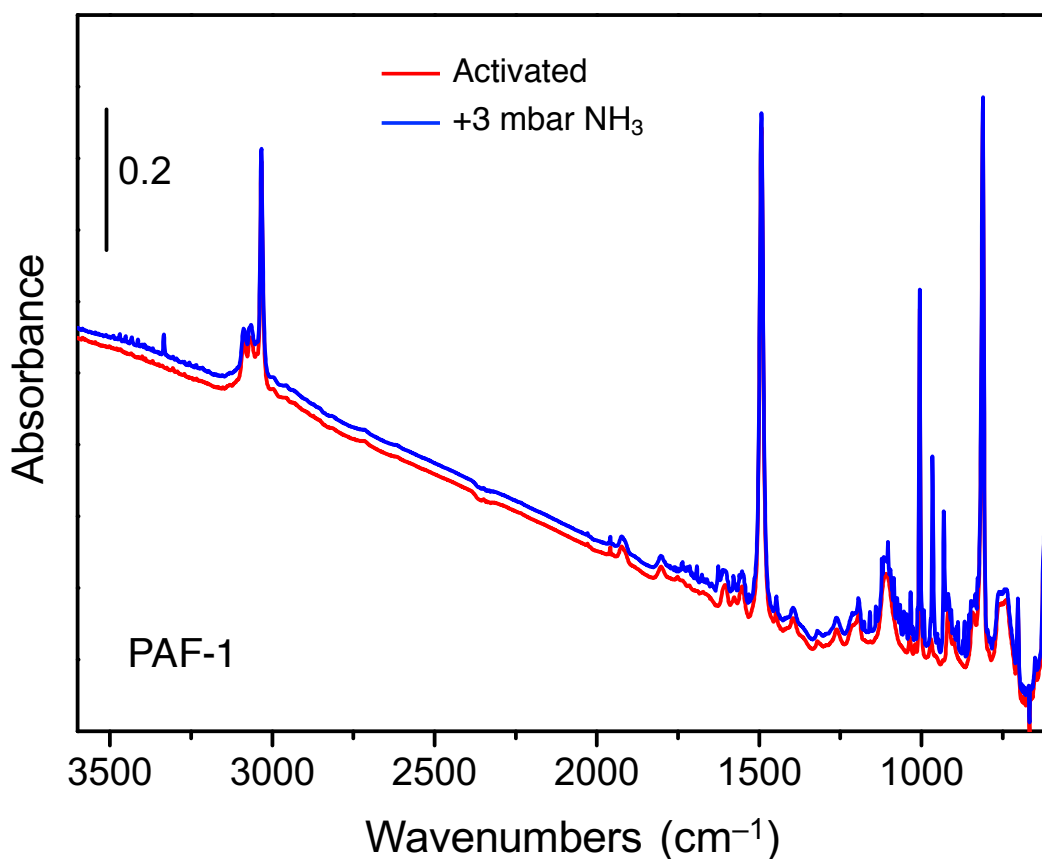

**Fig. S37** Infrared spectra of PAF-1 collected at 298 K after its thermal activation under vacuum (red line) and equilibration with ammonia at an equilibrium pressure of 3 mbar (blue line).

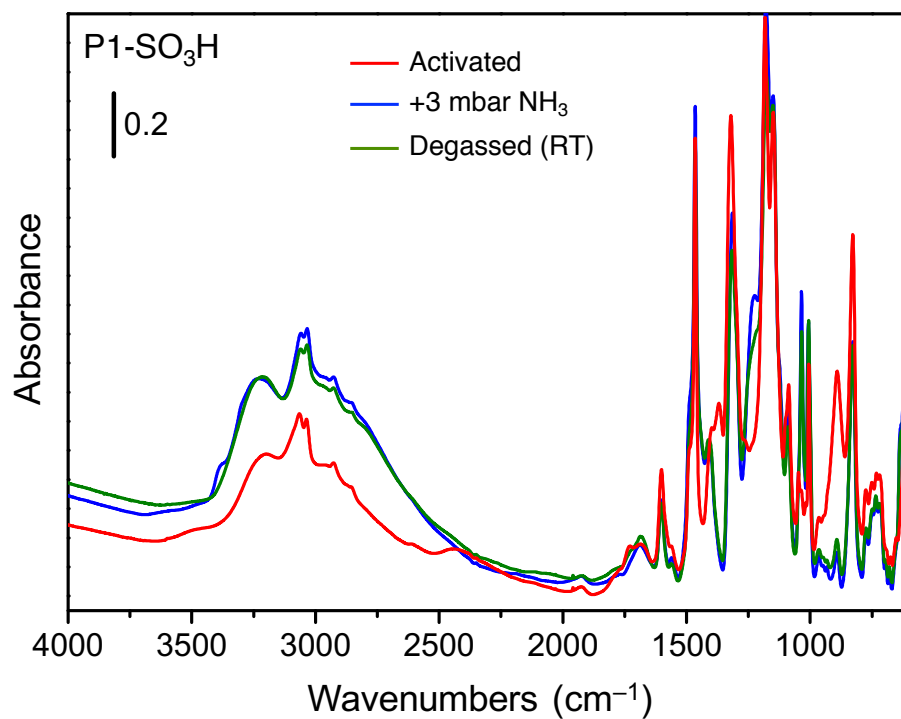

**Fig. S38** Infrared spectra of P1-SO<sub>3</sub>H collected at 298 K after its thermal activation under vacuum (red line), equilibration with ammonia at an equilibrium pressure of 3 mbar (blue line), and evacuation under vacuum (green line).

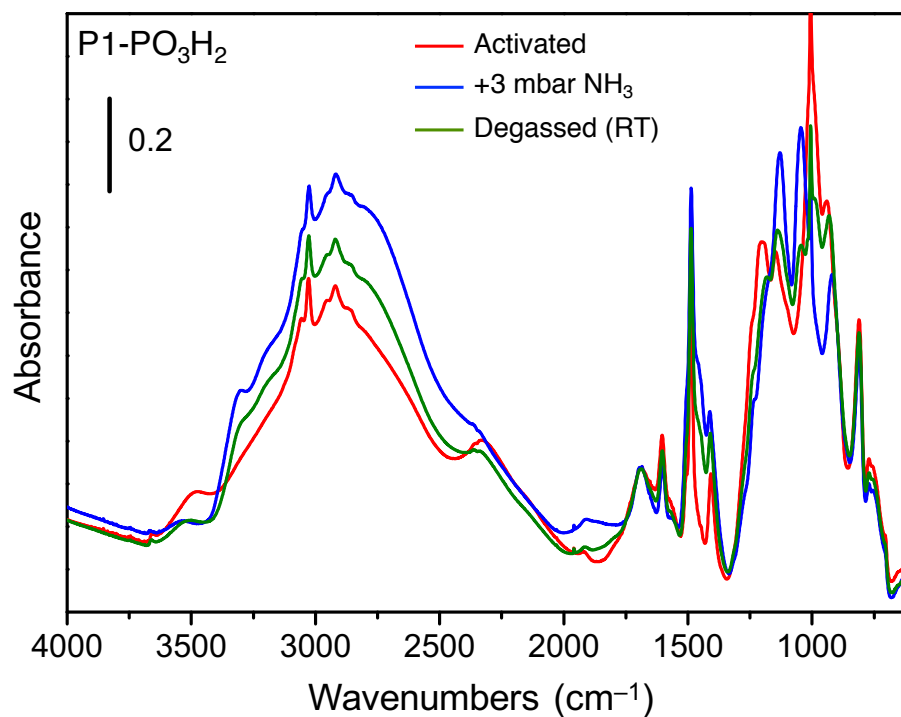

**Fig. S39** Infrared spectra of P1-PO<sub>3</sub>H<sub>2</sub> collected at 298 K after its thermal activation under vacuum (red line), equilibration with ammonia at an equilibrium pressure of 3 mbar (blue line), and evacuation under vacuum (green line).

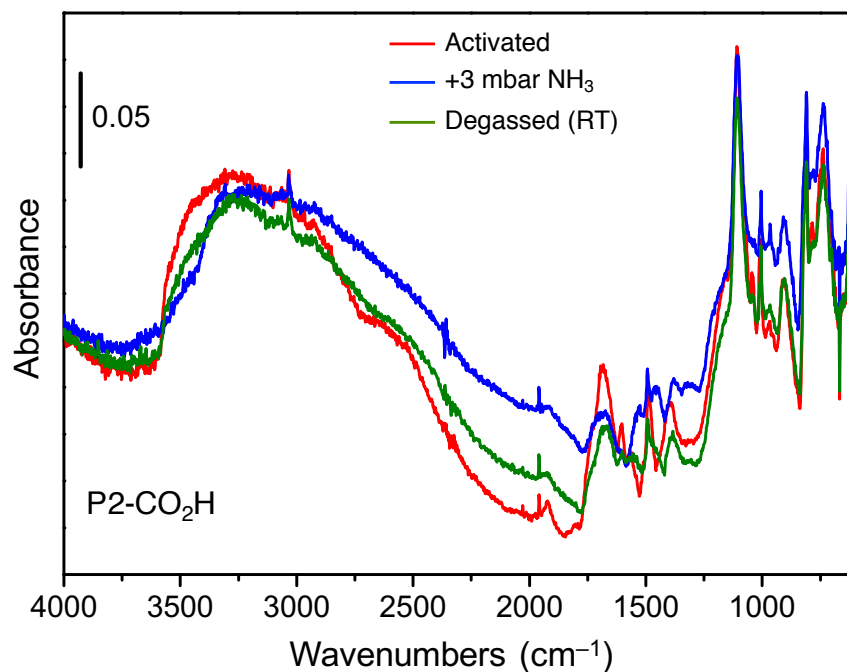

**Fig. S40** Infrared spectra of P2-CO<sub>2</sub>H collected at 298 K after its thermal activation under vacuum (red line), equilibration with ammonia at an equilibrium pressure of 3 mbar (blue line), and evacuation under vacuum (green line).

### 7. Water Isotherm for P1-SO<sub>3</sub>H

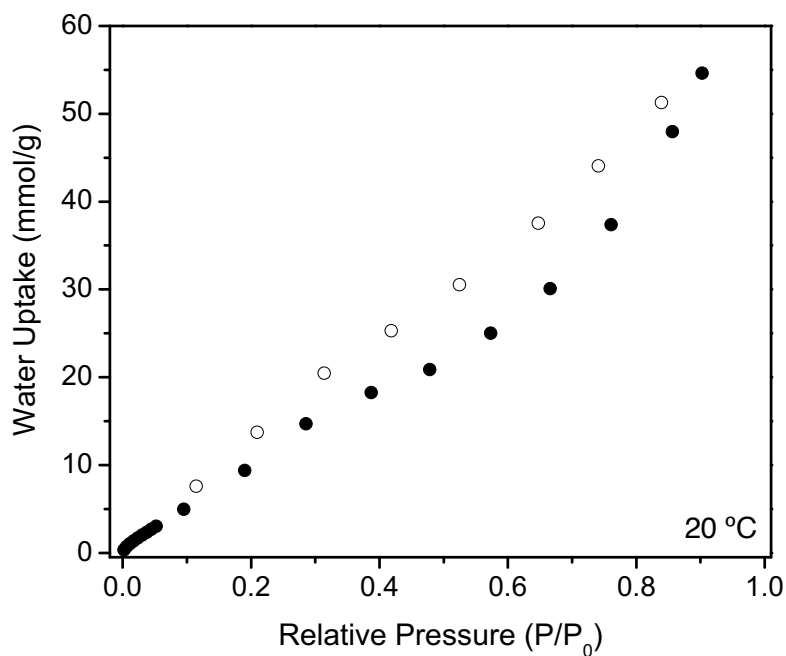

**Fig. S41** Water adsorption isotherm of P1-SO<sub>3</sub>H at 20 °C (P<sub>0</sub> = 23.393 mbar). Closed and open symbols represent adsorption and desorption branches, respectively.

## 8. List of Porous Materials and Their NH<sub>3</sub> Uptake Capacities

**Table S3** Low-pressure NH<sub>3</sub> uptake capacities of metal-organic frameworks and porous polymers

|                                 | Pressure or concentration | Temperature (K) | Capacity (mmol/g) |       | Reference |
|---------------------------------|---------------------------|-----------------|-------------------|-------|-----------|
|                                 |                           |                 | Dry               | Humid |           |
| <i>Metal-Organic Frameworks</i> |                           |                 |                   |       |           |
| MOF-5                           | 9900 ppm                  | 298             | 0.35              | -     | 19        |
| IRMOF-3                         | 9900 ppm                  | 298             | 6.18              | -     | 19        |
| MOF-177                         | 9900 ppm                  | 298             | 2.47              | -     | 19        |
| IRMOF-62                        | 9900 ppm                  | 298             | 1.35              | -     | 19        |
| MOF-199/HKUST-1                 | 9900 ppm                  | 298             | 5.12              | -     | 19        |
|                                 | 1440 ppm                  | 293             | 6.6               | 8.9   | 16        |
|                                 | 1000 ppm                  | 298             | 6.76              | 10.12 | 20        |
| Zn-MOF-74                       | 9900 ppm                  | 298             | 5.47              | -     | 19        |
|                                 | 1440 ppm                  | 293             | 3.7               | 2.8   | 17        |
| Mg-MOF-74                       | 1440 ppm                  | 293             | 7.6               | 1.7   | 17        |
| Co-MOF-74                       | 1440 ppm                  | 293             | 6.7               | 4.3   | 17        |
| Ni-MOF-74                       | 1440 ppm                  | 293             | 2.3               | 1.9   | 17        |
| Cu-MOF-74                       | 2880 ppm                  | 293             | 3.4               | 7.6   | 21        |
| Fe-MIL-100                      | 1000 ppm                  | 298             | 4.34              | 2.34  | 22        |
| DUT-6/MOF-205                   | 1 mbar                    | 298             | 0.8               | -     | 23        |
| DUT-6-(OH) <sub>2</sub>         | 1 mbar                    | 298             | 4.7               | -     | 23        |
| UiO-66-NH <sub>2</sub>          | 2880 ppm                  | 293             | 3.3               | 2.9   | 24        |
|                                 | 1 mbar                    | 298             | 1.26              | -     | 6         |
|                                 | 1440 ppm                  | 293             | 3.56              | 3.01  | 25        |
|                                 | 1440 ppm                  | 293             | 4.04              | 3.43  | 26        |
| UiO-66-NH <sub>3</sub> Cl       | 1 mbar                    | 298             | 2.97              | -     | 6         |
| Fe-MIL-101-SO <sub>3</sub> H    | 1 mbar                    | 298             | 3.87              | --    | 6         |
| DMOF                            | 1440 ppm                  | 293             | 0.27              | 5.56  | 26        |
| DMOF-NH <sub>2</sub>            | 1440 ppm                  | 293             | 1.23              | 1.29  | 26        |
| ZnMOF                           | 1440 ppm                  | 293             | 0.25              | 2.59  | 26        |
| CuMOF                           | 1440 ppm                  | 293             | 0.2               | 0.144 | 26        |
| Cu-BTB                          | 1440 ppm                  | 293             | 2.19              | 5.95  | 26        |

**Table S3** Continued

|                                                | Pressure or concentration | Temperature (K) | Capacity (mmol/g) |       | Reference        |
|------------------------------------------------|---------------------------|-----------------|-------------------|-------|------------------|
|                                                |                           |                 | Dry               | Humid |                  |
| UiO-66                                         | 2880 ppm                  | 293             | 2.0               | -     | 27               |
|                                                | 1440 ppm                  | 293             | 1.79              | 2.75  | 25               |
| ZnBTTB                                         | 1440 ppm                  | 293             | 4.59              | 20.26 | 25               |
| DMOF-A                                         | 1440 ppm                  | 293             | 0.48              | 1.18  | 25               |
| DMOF-TM2                                       | 1440 ppm                  | 293             | 0.15              | 4.57  | 25               |
| UiO-66-NO <sub>2</sub>                         | 1440 ppm                  | 293             | 1.98              | 1.60  | 25               |
| UiO-66-OH                                      | 2880 ppm                  | 293             | 5.69              | 2.77  | 25               |
| UiO-66-(OH) <sub>2</sub>                       | 2880 ppm                  | 293             | 2.29              | 2.16  | 25               |
| UiO-66-SO <sub>3</sub> H                       | 2880 ppm                  | 293             | 2.24              | 1.45  | 25               |
| UiO-66-(COOH) <sub>2</sub>                     | 2880 ppm                  | 293             | 2.83              | 1.83  | 25               |
| UiO-66-ox                                      | 2880 ppm                  | 293             | 2.5               | -     | 27               |
| 13X Zeolite                                    | 1440 ppm                  | 293             | 2.86              | 0.62  | 17               |
|                                                | 3 mbar                    | 298             | 4.94              | -     | 28               |
| <i>Porous Polymers</i>                         |                           |                 |                   |       |                  |
| NU-POP-1                                       | 1440 ppm                  | 293             | 5.56              | 6.17  | 29               |
| Catechol polymer                               | 1440 ppm                  | 293             | 0.70              | 1.31  | 30               |
| Zn-catecholate polymer                         | 1440 ppm                  | 293             | 1.36              | 3.32  | 30               |
| Cu-catecholate polymer                         | 1440 ppm                  | 293             | 2.1               | 4.32  | 30               |
| Amberlyst 15                                   | 1 mbar                    | 298             | 4.7               | -     | 28               |
| P1-NH <sub>3</sub> Cl (BPP-2)                  | 2880 ppm                  | 293             | 0.7               | 2.0   | <i>This work</i> |
| P1-SO <sub>3</sub> H (PPN-6-SO <sub>3</sub> H) | 2880 ppm                  | 293             | 3.9               | 8.1   | <i>This work</i> |
| P1-PO <sub>3</sub> H <sub>2</sub>              | 2880 ppm                  | 293             | 5.2               | 7.2   | <i>This work</i> |
| P2-NH <sub>3</sub> Cl                          | 2880 ppm                  | 293             | 1.0               | 1.5   | <i>This work</i> |
| P2-SO <sub>3</sub> H                           | 2880 ppm                  | 293             | 4.0               | 4.3   | <i>This work</i> |
| P2-CO <sub>2</sub> H (BPP-7)                   | 2880 ppm                  | 293             | 6.7               | 7.4   | <i>This work</i> |



**Table S4** NH<sub>3</sub> uptake capacities of metal-organic frameworks and porous polymers at 1 bar

|                                                | Pressure | Temperature (K) | Capacity (mmol/g) |       | Reference        |
|------------------------------------------------|----------|-----------------|-------------------|-------|------------------|
|                                                |          |                 | Dry               | Humid |                  |
| COF-10                                         | 1 bar    | 298             | 15                | -     | 31               |
| 13X zeolite                                    | 1 bar    | 298             | 9                 | -     | 31               |
| Amberlyst 15                                   | 1 bar    | 298             | 11                | -     | 31               |
| MCM-41                                         | 1 bar    | 298             | 7.9               | -     | 31               |
| DUT-6/MOF-205                                  | 1 bar    | 298             | 12                | -     | 23               |
| DUT-6-(OH) <sub>2</sub>                        | 1 bar    | 298             | 16.4              | -     | 23               |
| UiO-66-NH <sub>2</sub>                         | 1 bar    | 298             | 10.6              | -     | 6                |
| UiO-66-NH <sub>3</sub> Cl                      | 1 bar    | 298             | 12.1              | -     | 6                |
| Fe-MIL-101-SO <sub>3</sub> H                   | 1 bar    | 298             | 17.8              | -     | 6                |
| Prussian blue                                  | 1 bar    | 298             | 12.5              | -     | 32 <sup>a</sup>  |
| Co[Co(CN) <sub>6</sub> ] <sub>0.60</sub>       | 1 bar    | 298             | 21.9              | -     | 32 <sup>a</sup>  |
| Cu[Fe(CN) <sub>6</sub> ] <sub>0.50</sub>       | 1 bar    | 298             | 20.2              | -     | 32 <sup>a</sup>  |
| Mn <sub>2</sub> Cl <sub>2</sub> (BTDD)         | 1 bar    | 298             | 15.47             | -     | 33 <sup>a</sup>  |
| Co <sub>2</sub> Cl <sub>2</sub> (BTDD)         | 1 bar    | 298             | 12.00             | -     | 33 <sup>a</sup>  |
| Ni <sub>2</sub> Cl <sub>2</sub> (BTDD)         | 1 bar    | 298             | 12.02             | -     | 33 <sup>a</sup>  |
| P1-NH <sub>3</sub> Cl (BPP-2)                  | 1 bar    | 298             | 11.2              | -     | 6                |
| P1-SO <sub>3</sub> H (PPN-6-SO <sub>3</sub> H) | 1 bar    | 298             | 12.1              | -     | 6                |
| P1-PO <sub>3</sub> H <sub>2</sub>              | 1 bar    | 298             | 18.7              | -     | <i>This work</i> |
| P2-NH <sub>3</sub> Cl                          | 1 bar    | 298             | 16.3              | -     | <i>This work</i> |
| P2-SO <sub>3</sub> H                           | 1 bar    | 298             | 13.1              | -     | <i>This work</i> |
| P2-CO <sub>2</sub> H (BPP-7)                   | 1 bar    | 298             | 16.1              | -     | 6                |

<sup>a</sup> These reports have recently appeared in the literature during the preparation of this manuscript.

## 9. References

- 1 W. G. Lu, D. Q. Yuan, D. Zhao, C. I. Schilling, O. Plietzsch, T. Muller, S. Brase, J. Guenther, J. Blumel, R. Krishna, Z. Li and H. C. Zhou, *Chem. Mater.*, 2010, **22**, 5964.
- 2 A. M. Fracaroli, H. Furukawa, M. Suzuki, M. Dodd, S. Okajima, F. Gandara, J. A. Reimer and O. M. Yaghi, *J. Am. Chem. Soc.*, 2014, **136**, 8863.
- 3 T. Nakamura, K. Yonesu, Y. Mizuno, C. Suzuki, Y. Sakata, Y. Takuwa, F. Nara and S. Satoh, *Bioorg. Med. Chem.*, 2007, **15**, 3548.
- 4 T. Ben, H. Ren, S. Q. Ma, D. P. Cao, J. H. Lan, X. F. Jing, W. C. Wang, J. Xu, F. Deng, J. M. Simmons, S. L. Qiu and G. S. Zhu, *Angew. Chem. Int. Ed.*, 2009, **48**, 9457.
- 5 W. G. Lu, J. P. Sculley, D. Q. Yuan, R. Krishna, Z. W. Wei and H. C. Zhou, *Angew. Chem. Int. Ed.*, 2012, **51**, 7480.
- 6 J. F. Van Humbeck, T. M. McDonald, X. F. Jing, B. M. Wiers, G. S. Zhu and J. R. Long, *J. Am. Chem. Soc.*, 2014, **136**, 2432.
- 7 W. G. Lu, D. Q. Yuan, J. L. Sculley, D. Zhao, R. Krishna and H. C. Zhou, *J. Am. Chem. Soc.*, 2011, **133**, 18126.
- 8 W. Qu, X. Q. Zhu, J. H. Chen, L. Niu, D. H. Liang, X. H. Fan, Z. H. Shen and Q. F. Zhou, *Macromolecules*, 2014, **47**, 2727.
- 9 O. Plietzsch, C. I. Schilling, M. Tolev, M. Nieger, C. Richert, T. Muller and S. Brase, *Org. Biomol. Chem.*, 2009, **7**, 4734.
- 10 E. Stockel, X. F. Wu, A. Trewin, C. D. Wood, R. Clowes, N. L. Campbell, J. T. A. Jones, Y. Z. Khimyak, D. J. Adams and A. I. Cooper, *Chem. Commun.*, 2009, 212.
- 11 R. Dawson, A. Laybourn, R. Clowes, Y. Z. Khimyak, D. J. Adams and A. I. Cooper, *Macromolecules*, 2009, **42**, 8809.
- 12 Y. Yu, S. L. Jiang and F. Sun, *Ind. Eng. Chem. Res.*, 2014, **53**, 16135.
- 13 M. Porz, D. Maker, K. Brodner and U. H. F. Bunz, *Macromol. Rapid Commun.*, 2013, **34**, 873.
- 14 C. Behloul, D. Guijarro and M. Yus, *Synthesis*, 2006, 309.
- 15 H. P. Ma, H. Ren, X. Q. Zou, S. Meng, F. X. Sun and G. S. Zhu, *Polym. Chem.*, 2014, **5**, 144.
- 16 G. W. Peterson, G. W. Wagner, A. Balboa, J. Mahle, T. Sewell and C. J. Karwacki, *J. Phys. Chem. C*, 2009, **113**, 13906.
- 17 T. G. Glover, G. W. Peterson, B. J. Schindler, D. Britt and O. Yaghi, *Chem. Eng. Sci.*, 2011, **66**, 163.
- 18 J. B. DeCoste and G. W. Peterson, *J. Vis. Exp.*, 2013, e51175.
- 19 D. Britt, D. Tranchemontagne and O. M. Yaghi, *Proc. Natl. Acad. Sci. U.S.A.*, 2008, **105**, 11623.

- 20 C. Petit, B. Mendoza and T. J. Bandoz, *Langmuir*, 2010, **26**, 15302.
- 21 M. J. Katz, A. J. Howarth, P. Z. Moghadam, J. B. DeCoste, R. Q. Snurr, J. T. Hupp and O. K. Farha, *Dalton Trans.*, 2016, **45**, 4150.
- 22 C. Petit and T. J. Bandoz, *Adv. Funct. Mater.*, 2011, **21**, 2108.
- 23 I. Spanopoulos, P. Xydias, C. D. Malliakas and P. N. Trikalitis, *Inorg. Chem.*, 2013, **52**, 855.
- 24 G. W. Peterson, J. B. DeCoste, F. Fatollahi-Fard and D. K. Britt, *Ind. Eng. Chem. Res.*, 2014, **53**, 701.
- 25 H. Jasuja, G. W. Peterson, J. B. Decoste, M. A. Browe and K. S. Walton, *Chem. Eng. Sci.*, 2015, **124**, 118.
- 26 B. Mu, PhD thesis, Georgia Institute of Technology, 2011.
- 27 J. B. DeCoste, T. J. Demasky, M. J. Katz, O. K. Farha and J. T. Hupp, *New J. Chem.*, 2015, **39**, 2396.
- 28 J. Helminen, J. Helenius, E. Paatero and I. Turunen, *J. Chem. Eng. Data*, 2001, **46**, 391.
- 29 G. W. Peterson, O. K. Farha, B. Schindler, P. Jones, J. Mahle and J. T. Hupp, *J. Porous Mater.*, 2012, **19**, 261.
- 30 M. H. Weston, G. W. Peterson, M. A. Browe, P. Jones, O. K. Farha, J. T. Hupp and S. T. Nguyen, *Chem. Commun.*, 2013, **49**, 2995.
- 31 C. J. Doonan, D. J. Tranchemontagne, T. G. Glover, J. R. Hunt and O. M. Yaghi, *Nat. Chem.*, 2010, **2**, 235.
- 32 A. Takahashi, H. Tanaka, D. Parajuli, T. Nakamura, K. Minami, Y. Sugiyama, Y. Hakuta, S. Ohkoshi and T. Kawamoto, *J. Am. Chem. Soc.*, 2016, **138**, 6376.
- 33 A. J. Rieth, Y. Tulchinsky and M. Dincă, *J. Am. Chem. Soc.*, 2016, **138**, 9401.
